# Supplementary material for: Intercomparison of Terrestrial Carbon Fluxes and Carbon Use Efficiency Simulated by CMIP5 Earth System Models
Source: Copernicus journal article supplement (doi:10.5194/bg-2016-536), 2016-12-16
Supplement: Supplementary file [file bg-2016-536-AC2-supplement.pdf]

1  
2  
3  
4 **Intercomparison of Terrestrial Carbon Fluxes and Carbon Use Efficiency Simulated by**  
5 **CMIP5 Earth System Models**  
6

7 Dongmin Kim<sup>1</sup>, Myong-In Lee<sup>1\*</sup>, Su-Jong Jeong<sup>2</sup>, Jungho Im<sup>1</sup>, Dong Hyun Cha<sup>1</sup> and  
8 Sanggyun Lee<sup>1</sup>  
9

10  
11 <sup>1</sup>School of Urban and Environmental Engineering, Ulsan National Institute of Science and  
12 Technology, Ulsan, Korea  
13

14 <sup>2</sup>School of Environmental Science and Engineering, Southern University of Science and  
15 Technology, Nanshan, Shenzhen, Guangdong, China  
16  
17  
18  
19  
20  
21  
22

23 Revised  
24  
25  
26  
27

28 ~~December~~ March 114, 20176  
29  
30  
31  
32  
33  
34  
35  
36  
37  
38  
39  
40  
41  
42  
43

44 -----  
45 Corresponding author: Dr. Myong-In Lee  
46 School of Urban and Environmental Engineering  
47 Ulsan National Institute of Science and Technology,  
48 50 UNIST-gil, Ulsan 44919, Korea  
49 Email: [milee@unist.ac.kr](mailto:milee@unist.ac.kr)

50 **Abstract**

51 This study compares historical simulations of the terrestrial carbon cycle produced by 10  
52 Earth System Models (ESMs) that participated in the fifth phase of the Coupled Model  
53 Intercomparison Project (CMIP5). Using MODIS satellite estimates, this study validates the  
54 simulation of gross primary production (GPP), net primary production (NPP), and carbon use  
55 efficiency (CUE), which depend on plant function types (PFTs). The models show noticeable  
56 deficiencies compared to the MODIS data in the simulation of the spatial patterns of GPP and  
57 NPP and large differences among the simulations, although the multi-model ensemble (MME)  
58 mean provides a realistic global mean value and spatial distributions. The larger model spreads  
59 in GPP and NPP compared to those of surface temperature and precipitation suggest that the  
60 differences among simulations in terms of the terrestrial carbon cycle are largely due to  
61 uncertainties in the parameterization of terrestrial carbon fluxes by vegetation. The models also  
62 exhibit large spatial differences in their simulated CUE values and at locations where the  
63 dominant PFT changes, primarily due to differences in the parameterizations. While the MME-  
64 simulated CUE values show a strong dependence on surface temperatures, the observed CUE  
65 values from MODIS show greater complexity, as well as non-linear sensitivity. This leads to  
66 the overall underestimation of CUE using most of the PFTs incorporated into current ESMs.  
67 The results of this comparison suggest that more careful and extensive validation is needed to  
68 improve the terrestrial carbon cycle in terms of ecosystem-level processes.

69

70 **Keywords:** earth system models, carbon use efficiency, CMIP5, MODIS, GPP, NPP

71

72

## 73 **1. Introduction**

74 Earth system models (ESMs) have been developed in the past several decades to simulate  
75 vegetation changes in space and time through carbon cycle-related interactions between the  
76 biosphere and the atmosphere. The temporal variations in atmospheric CO<sub>2</sub> in the models are  
77 driven by CO<sub>2</sub> emissions from natural and anthropogenic sources, as well as uptake by  
78 vegetated land surfaces and the ocean. Net imbalances in carbon fluxes drive the secular trend  
79 in CO<sub>2</sub>. The magnitude of the imbalance is model-dependent and results in differences in the  
80 future warming projected by various ESMs. Previous studies showed that the observed trend  
81 of atmospheric CO<sub>2</sub> was not reproduced correctly during the past century, given the historical  
82 record. There was also substantial spread among models, even though they were forced by  
83 identical anthropogenic emissions (Friedlingstein et al., 2006, 2014; Hoffman et al., 2013; Zhao  
84 and Zeng, 2014). The model bias persists into their future projections. Hoffman et al. (2013)  
85 pointed out that the spread of projected CO<sub>2</sub> concentrations among fifteen Coupled Model  
86 Intercomparison Project (CMIP5; Taylor et al., 2012) ESMs in 2100 was approximately 20 %  
87 of their multi-model average. Friedlingstein et al. (2014) showed that the degree of surface  
88 temperature warming by 2100 was different by more than a factor of two, depending on the  
89 models and representative concentration pathway (RCP) 8.5 scenarios used.

90 Previous studies (Friedlingstein et al., 2006; Booth et al., 2012; Hoffman et al., 2013; Anav  
91 et al., 2013; Aroa et al., 2013; Friedlingstein et al., 2014) have suggested that the uncertainty  
92 in CO<sub>2</sub> concentrations simulated by ESMs should be largely attributed to the terrestrial carbon  
93 uptake, rather than to the uptake by ocean. Hoffman et al. (2013) and Friedlingstein et al. (2014)  
94 compared the carbon uptake by land and ocean, simulated by ESMs and found that the amount  
95 of carbon accumulated by the ocean is positive in all models by 2100, whereas the models  
96 exhibited a large spread in the amount of carbon taken up by the land; the results even had

97 different signs. Aroa et al. (2013) indicated that the simulated sensitivity of terrestrial carbon  
98 storage to the atmospheric CO<sub>2</sub> concentration was 3-4 times larger than that of ocean. This  
99 suggests that the terrestrial carbon cycle is one of the important factors that need improvement  
100 for minimizing uncertainty in future climate predictions.

101 It is generally recognized that changes in the carbon pools in the biosphere should play a key  
102 role in determining atmospheric CO<sub>2</sub> concentration levels in the future. Shao et al. (2013)  
103 showed that the net biome production (NBP) simulated by CMIP5 ESMs is enhanced in the  
104 21st century and that the biomass particularly increases over tropical rainforests and vegetated  
105 surfaces in the mid-latitudes through the CO<sub>2</sub> fertilization effect. Not only long-term increases  
106 in biomass but also future changes in its seasonal cycle would significantly affect CO<sub>2</sub>  
107 concentrations. Zhao and Zeng (2014) indicated that the amplitude of the seasonal cycle of  
108 atmospheric CO<sub>2</sub> tends to increase in the future, due to an increase of 68 % in the seasonal  
109 cycle of NBP during the growing season in their future simulations. Comprehensive model  
110 intercomparisons on the simulation of biome production at various ecosystem levels are needed  
111 to explain the differences among simulations and minimize projection uncertainties.

112 The exchange of carbon between the atmosphere and terrestrial ecosystems consists of  
113 complicated biogeochemical processes operating over a heterogeneous surface, and the quality  
114 and the performance of the global model simulations is often diagnosed using carbon cycle  
115 variables such as gross primary production (GPP) and autotrophic respiration (Ra) by plants.  
116 Net primary production (NPP) is defined as GPP minus Ra. Heterotrophic respiration (Rh),  
117 involving the decomposition of soil litter, is also an important process involved in the carbon  
118 cycle. By validation using ground and satellite observational data, previous studies identified  
119 the systematic biases of ESMs and discussed the possible reasons for these biases. Anav et al.  
120 (2013) indicated that current ESMs tend to overestimate terrestrial biomass and global GPP

121 (Anav et al., 2013). Shao et al. (2013) showed that ESMs exhibit large disagreements in the  
122 relationship between carbon cycle variables and hydrological variables, such as precipitation  
123 and soil moisture, emphasizing the importance of the hydrological cycle in terms of its effects  
124 on the terrestrial carbon cycle. The simulated soil carbon amount in the subsurface root zone,  
125 which is the major source of plant growth, showed systematic biases and large model spread,  
126 from 40 to 240 %, compared with observational data (Todd-Brown et al., 2013). That study  
127 suggested that it might be responsible for the large spread of atmospheric CO<sub>2</sub> concentrations  
128 simulated by the models.

129 While most previous intercomparison studies involving ESMs have focused on the  
130 validation of the global mean budget of terrestrial carbon pools and fluxes (Anav et al., 2013;  
131 Shao et al., 2013; Todd-Brown et al., 2013), which is useful for evaluating the overall  
132 performance of ESMs and quantifying simulation uncertainties, more detailed analyses  
133 addressing regional scales and different vegetation types are needed to identify the key sources  
134 of systematic biases in the models. Anav et al. (2013) evaluated regional changes in  
135 biogeochemical variables for two hemispheres and the tropical region separately. In particular,  
136 an investigation of systematic biases in different types of ecosystems is required to improve  
137 the existing parameterizations of terrestrial carbon fluxes by vegetation. In contrast to the many  
138 observational studies in biology that address various plant function type (PFT) levels (De Lucia  
139 et al., 2007; Zhang et al., 2009; Zhang et al., 2014), studies that benchmark model simulations  
140 of PFT levels have obtained less attention, and this is one of the primary motivations of this  
141 study.

142 For a better elucidation of systematic biases in the models, this study focuses particularly on  
143 the comparison of carbon use efficiency (CUE), which is sensitive to the various PFTs. For the  
144 short-term carbon cycle,  $R_a$  is a primary measure of the release of carbon to the atmosphere,

145 and its magnitude is known to be about half of GPP for most vegetated surfaces (King et al.,  
146 2006; Piao et al., 2010). CUE is defined as the ratio of NPP to GPP, which is a useful diagnostic  
147 measure for the comparison of parameterizations for the terrestrial carbon fluxes driven by  
148 vegetation that are implemented differently in current ESMs. The absolute magnitudes of the  
149 production terms are the results of feedbacks between climate and vegetation. Normalized flux  
150 terms can highlight the differences among simulations driven by parameterization differences  
151 in terrestrial carbon fluxes. Previous studies based on in situ (De Lucia et al., 2007) and satellite  
152 (Zhang et al., 2009) data analyses have indicated that CUE is not a constant with a value of  
153 approximately 0.47 (Gifford, 1994; Dewar et al., 1999) but varies depending on climatic  
154 conditions and PFTs. In this regard, the Moderate Resolution Imaging Spectroradiometer  
155 (MODIS) satellite data provide the global coverage of GPP and NPP as a useful reference for  
156 the model validation for CUE at the PFT level. Zhang et al. (2014) suggested observed CUE  
157 by MODIS tends to slightly increase in the recent years.

158 The purpose of this study is the intercomparison of CMIP5 ESMs in terms of their  
159 simulations of the terrestrial carbon cycle, based on a quantitative evaluation of the  
160 performance of terrestrial carbon flux parameterizations in their land surface models (LSM).  
161 This analysis specifically focuses on the assessment of CUE at the PFT level and makes an  
162 effort to provide useful suggestions to the modeling community for reducing systematic biases  
163 in the terrestrial carbon cycle in current ESMs. This study consists of following sections:  
164 Section 2 describes the observational data and model output used in this study. Section 3  
165 compares the model simulations in terms of their climate and terrestrial carbon cycle variables,  
166 comparing first the multi-model ensemble (MME) average to diagnose common and systematic  
167 biases in the current models and then identifies differences among simulations across the ESMs  
168 in their simulated climates and carbon fluxes. The comparison of CUE at various PFT levels is

169 followed by more comprehensive comparisons for identifying differences among simulations  
170 driven by model parameterizations. Finally, Section 4 provides a summary and conclusions.

171

## 172 **2. Data and Analysis Methods**

### 173 **2.1 Observational data**

174 This study used GPP and NPP as primary variables to validate the global carbon cycle as  
175 simulated by various ESMs. Reference observational data were obtained from the NASA  
176 MODIS MOD17 data product, which includes the first satellite-driven estimates of carbon  
177 fluxes on vegetated surfaces on a global scale (Running and Gower, 1991; Zhao et al., 2005).

178 The MODIS algorithm uses a data model based on the radiation use efficiency logic of  
179 Monteith (1972) to estimate GPP, which is basically a linear function of the amount of  
180 Photosynthetically Active Radiation (PAR) absorbed. The fraction of PAR and the leaf area  
181 index (LAI) are provided to the model by the MODIS MOD15 products. A conversion  
182 efficiency parameter relating absorbed radiation to the actual productivity depends on  
183 vegetation type and climate condition. The upper limit of conversion efficiency uses the Biome  
184 Parameter Lookup Table (BPLUT) for different vegetation types. The vegetation types include  
185 evergreen needleleaf forest (ENF), evergreen broadleaf forest (EBF), deciduous needleleaf  
186 forest (DNF), deciduous broadleaf forest (DBF), mixed forests (MF), open and closed  
187 shrublands (SHR), grasslands (GRA), and croplands (CROP), which are based on the land  
188 cover classification from the MODIS MCD12Q1  
189 ([https://lpdaac.usgs.gov/dataset\\_discovery/modis/modis\\_products\\_table/mcd12q1](https://lpdaac.usgs.gov/dataset_discovery/modis/modis_products_table/mcd12q1)). Figure 1  
190 shows the horizontal distribution of vegetation types from MODIS. The conversion efficiency  
191 is modified by climate conditions such as incoming solar radiation, temperature, and vapor  
192 pressure deficit, which are obtained from atmospheric reanalyses developed by NASA's Global

193 Modeling and Assimilation Office and the NCEP/NCAR Reanalysis II. The NPP estimation  
194 by MODIS calculates daily leaf and fine root maintenance respiration, annual growth  
195 respiration, and annual maintenance respiration of live cells in woody tissue, which are  
196 subtracted from the GPP. Biome-specific physiological parameters are also specified by  
197 BPLUT for respiration calculations.

198 The MOD17 dataset provides 8-day, monthly, and annual mean GPP and NPP for 2000-2012.  
199 This study used the gridded GPP and NPP products, which have a spatial resolution of 30  
200 arcsec (0.0083 degree), provided by the Numerical Terradynamic Simulation Group (NTSG)  
201 of the University of Montana (NTSG MOD17 v55).

202 Although MODIS is affected by uncertainties in biomass types and meteorological data sets  
203 (Zhao et al. 2005), the derived GPP and NPP values are able to capture realistic spatial and  
204 temporal variations over different biomes and climate regimes. Zhao et al. (2005) and Heinsch  
205 et al. (2006) demonstrated that the data are consistent with ground-based flux tower  
206 measurements of GPP and field-observed NPP estimates with high correlation ( $r=0.859$ ).

207 [To warrant the use of gridded MODIS data as reference observations in this study, we](#)  
208 [compared MODIS GPP data and station-based GPP data from 53 FLUXNET tower sites. The](#)  
209 [comparison of averaged GPP between MODIS and the data from tower sites for 6 years \(2000-](#)  
210 [2005\) shows a high r-squared value \( \$r^2=0.56\$ \). The MODIS data have been also widely used in](#)  
211 [previous studies with careful examinations with other in-situ observation data \(e.g., Heinsch et](#)  
212 [al. 2006; Turner et al. 2006; Zhao et al. 2005; and many\).](#)

213 For comparison with MODIS, this study also used GPP estimates from FLUXNET-MTE  
214 (Multi-Tree Ensemble; Jung et al., 2011), which is an upscaled data set providing global  
215 coverage that is derived from 178 surface flux tower observations using a machine learning  
216 technique. FLUXNET-MTE provides an explicit estimate of carbon fluxes over vegetated



217 surfaces. The dataset provides monthly data at a  $0.5^\circ \times 0.5^\circ$  (latitude  $\times$  longitude) spatial  
218 resolution and covers the period 1982 – 2007. Although this gridded global dataset is useful  
219 for validation of ESMs, its key limitations are also discussed in the literature (Jung et al., 2011).  
220 Wide geographical regions are not represented by measurement stations; for example, there is  
221 a lack of samples over Siberia, Africa, South America and tropical Asia compared with North  
222 America and Europe. Estimates of annual-mean upscaled ecosystem respiration have higher  
223 certainty than the anomalies and show approximately 5-10 % underestimation. Additionally,  
224 the data have limitations in accounting for disturbances due to land use changes, given that  
225 unchanged land cover data from the International Geosphere-Biosphere Program (IGBP)  
226 satellite are used for all periods. This may introduce spurious trends into the GPP estimates  
227 from the FLUXNET-MTE project. The dataset does not provide estimates of  $R_a$ , but instead  
228 provides the summation of  $R_a$  and  $R_h$ . The geographical distribution of satellite-derived GPP  
229 from MODIS shows a high degree of consistency with that from in situ FLUXNET  
230 observations. Figure 2 compares the annual GPP distributions from MODIS and FLUXNET  
231 for the same period, 2000-2005. A notable difference between the two appears in the Amazon,  
232 where MODIS tends to underestimate the productivity significantly. In the remaining regions,  
233 MODIS tends to produce slight underestimates in the tropics and overestimates in the high  
234 latitudes when compared with FLUXNET. The annual GPP values from MODIS and  
235 FLUXNET are 108.76 GtC and 107.41 GtC, respectively, for the averaging period of 2000-  
236 2005, with a small difference that is no more than 1 % of the total value. The pattern of  
237 differences did not change significantly even if the FLUXNET data were averaged over a  
238 longer period (1983-2005). In fact, the interannual variation did not modify the global-mean  
239 annual GPP value significantly when the reference period was extended to 1983-2005, which  
240 yielded a small reduction to 106.55 GtC using the FLUXNET data.

241 This study also used the observed surface air temperature and precipitation data from the  
242 Institute for Climate Impact Research based on the CRU (Climate Research Unit)  
243 meteorological dataset (Harris et al., 2014). In this data product, temperature and precipitation  
244 at stations worldwide were interpolated to a horizontal resolution of  $0.5^\circ \times 0.5^\circ$  (latitude  
245  $\times$  longitude) covering the global land surface.

246

## 247 **2.2 Model Data**

248 Historical simulations performed using 10 ESMs were used in this study. Brief descriptions  
249 of these models is provided in Table 1. The historical simulations (that is, experiment 5.2 or  
250 the ESM historical 1850–2005 simulation; Taylor et al., 2012) were forced by gridded CO<sub>2</sub>  
251 emissions data for fossil fuel consumption from Andres et al. (2011). While conventional CO<sub>2</sub>  
252 concentration-driven runs have no vegetation feedback on atmospheric CO<sub>2</sub>, these emissions-  
253 driven runs enables climate-carbon cycle feedbacks via changes in vegetation. Note that three  
254 models – GFDL-ESM2M, GFDL-ESM2G, and MPI-ESM LR – of them enabled the dynamic  
255 vegetation model in their historical simulations for 1850 – 2005, which model was able to  
256 consider dynamic change of PFT boundaries by climate conditions (Table 1). Atmospheric CO<sub>2</sub>  
257 concentrations are simulated prognostically from the net budget of natural and anthropogenic  
258 carbon fluxes to and from the atmosphere. The simulation of GPP is directly controlled by the  
259 formulae representing photosynthesis in the models. As shown in Table 1, the parameterization  
260 of photosynthesis by vegetation is formulated similarly in the 10 ESMs. This parameterization  
261 is mostly based on Farquhar et al. (1980) for C3 plants in cold climates, with revisions for C4  
262 plants in warm climates by Collatz et al. (1992). Leaf photosynthesis in CLM4 is proportional  
263 to the concentration of carbon dioxide in the atmosphere, as well as the temperature and

264 moisture surrounding leaves. It adjusted the minimum rate among the light-use, water-use and  
265 carbon assimilation approaches in CLM4.

266 NPP is diagnosed in ESMs by subtracting  $R_a$  from GPP. Parameterizations for  $R_a$  are more  
267 diverse in formulation across the models compared to that of photosynthesis. Note that  
268 CESM1-BGC and NorESM-ME1 incorporate identical land surface models, in which the  
269 nitrogen cycle is allowed to limit plant assimilation for the parameterization of carbon fluxes  
270 by terrestrial vegetation, so called the interactive carbon-nitrogen (CN) cycle. Respiration is  
271 proportional to temperature and nitrogen concentration. The models without interactive  
272 nitrogen cycles diagnose nitrogen concentrations from the carbon concentration in each carbon  
273 pool, whereas the models with interactive nitrogen cycles predict the nitrogen concentrations.

274 While the most ESMs use the dynamical parameterizations for GPP and  $R_a$ , the only  
275 exception is MRI-ESM, which uses an empirical formula for estimating NPP based on Obata  
276 (2007). In the model, the monthly NPP is empirically derived from physical variables such as  
277 temperature and precipitation from the Miami model (Lieth, 1975; Friedlingstein et al., 1995).

278 The model data were obtained from the Earth System Grid Federation (ESGF), an  
279 international network of distributed climate data servers (Williams et al., 2011). For the  
280 purposes of comparison, the model outputs, as well as the MODIS data, were interpolated onto  
281 the same  $1^\circ \times 1^\circ$  grid (latitude  $\times$  longitude).

282

### 283 **2.3 Analysis Methods**

284 In Section 3.3, CUE is diagnosed at the ecosystem level for the MODIS observations and  
285 the various ESM simulations. For simplicity, an identical distribution of vegetated surfaces  
286 based on to the MODIS classification (Figure 1) was applied to both the observed and the  
287 simulated fluxes. This is because each model has their own vegetation classifications, which

288 are not available from the CMIP5 data archive.

289 It is noted that the deficiency in the simulation of CUE by individual models is not only  
290 caused by deficiencies in the parameterization of carbon fluxes due to vegetation but also by  
291 differences in the classifications of PFTs, which are specified differently in each model. For  
292 example, LM3.0 in GFDL ESM2 M and ESM2G simulate 5 PFTs (i.e., 3 types of trees and 2  
293 types of grasses), while NCAR and NorESM's CLM4.0 specifies the PFTs in much greater  
294 detail by including 17 different types (i.e., 8 types of trees, 3 types of shrubs, 3 types of grasses  
295 and 3 types of crops). Although referencing PFTs from the observations instead of using own  
296 PFTs in each model might not be a perfect comparison, it is still meaningful to identify the first  
297 order differences driven by parameterization method and the classification difference as well  
298 where the latter is regarded as the model bias too.

299

300

### 301 **3. Results**

#### 302 **3.1. Systematic Biases in the Multi-Model Ensemble**

303 Systematic biases in the ESM simulations are examined first by taking multi-model  
304 ensemble averages (MME) for simulated surface air temperature and precipitation, respectively  
305 (Figure 3). Despite the realistic representation of annual-mean surface temperatures, MME  
306 exhibits systematic biases with significant hemispheric differences. Warm biases are seen in  
307 the Northern Hemisphere, particularly in northeastern Asia and North America, whereas there  
308 exists a cold bias in most of the Southern Hemisphere. MME generally shows wet biases in  
309 precipitation, except over South America. Wet biases seem to be consistent with cold biases in  
310 the tropical regions, where the deep convective rainfall tends to produce deep clouds that  
311 attenuate incoming solar radiation at the surface.

312 The annual GPP, NPP and Ra values from the MODIS observations and the MME are  
313 compared in Figure 4. The observed GPP values from MODIS are generally high in areas of  
314 EBF in tropical regions, such as Amazon, South Asia, and Central Africa, and in areas of DBF,  
315 such as those in Indochina, China, India, Europe and the southeastern part of North America.  
316 GPP is observed to be small in areas of SHR in Australia and in boreal regions of MF and GRA  
317 in northern Eurasia. GPP is close to zero over dry and non-vegetated surfaces, such as the  
318 Sahara Desert and central Australia. The MME of the ESMs tends to reproduce these  
319 geographical differences realistically, although the estimated magnitudes are too large over  
320 most of the globe. Although Ra tends to be overestimated as well, MME shows a net positive  
321 bias in NPP in most terrestrial regions, suggesting that the MME should underestimate the  
322 observed trend of atmospheric CO<sub>2</sub> increase.

323 The global-mean values of GPP, NPP, and Ra are compared in Figure 5. Note that spread of  
324 the simulations is large, particularly due to the outlier value produced by MRI-ESM1. The  
325 median value of GPP simulated by ESMs is centered slightly above the value from MODIS  
326 and is approximately 20 % higher (+18 GtC). The median value of NPP is also overestimated  
327 by 10.2 GtC compared with the 52.1 GtC NPP from MODIS. The median value of Ra is  
328 underestimated.

329 The formulations of GPP and Ra are closely related to temperature and precipitation  
330 (Rahman et al., 2005; Yang et al., 2006), and the model biases in those carbon fluxes might be  
331 driven both by systematic biases in climate conditions such as temperature and precipitation  
332 and the uncertainty in the parameterization formulations themselves. The Taylor diagram is a  
333 common and useful measure for simulated spatial distributions that calculates spatial  
334 correlation coefficients between observed and simulated values and the normalized standard  
335 deviation of simulated values from the global mean over the whole domain of comparison.

336 Figures 6a and 6b show Taylor diagrams ([Taylor, 2001](#)) for the annual mean surface air  
337 temperature and precipitation, respectively. The MME simulation of temperature by the CMIP5  
338 ESMs is quite close to the CRU observations. The spatial correlations are greater than 0.95 in  
339 all models. The normalized standard deviations are within the range of 0.8 to 1.5, which is  
340 relatively small compared with other simulated variables. The Taylor diagram of precipitation  
341 shows less accuracy and more model spread than that of SATs. The spatial correlation of the  
342 MME is approximately 0.76; the MME also shows higher normalized standard deviations  
343 compared with temperature, suggesting that current ESMs exhibit relatively larger  
344 discrepancies in precipitation and the terrestrial water cycle. Spatial patterns of GPP simulated  
345 by the ESMs (Figure 6c) show even larger systematic biases with lower spatial correlations and  
346 larger spatial changes (i.e., higher normalized standard deviations) than the observed values.  
347 Model spread becomes much larger than that of temperature and precipitation. The simulated  
348 pattern correlations from the ESMs are lowest for NPP (Figure 6d). The correlation for the  
349 MME is slightly higher than 0.5. The models also exhibit much higher spatial variation than  
350 the observed values for both GPP and NPP.

351 The Taylor diagram analysis suggests that the systematic biases in the ESMs may be  
352 successively amplified by deficiencies in the simulation of climate and the terrestrial carbon  
353 cycle. Regarding the climate conditions that affect the terrestrial carbon cycle, particularly the  
354 distribution of precipitation and the water cycle seem to contribute more to the bias than does  
355 temperature. In addition, the much larger spread in GPP and NPP simulated by the ESMs  
356 compared to that in temperature and precipitation suggests that there should be much larger  
357 uncertainty in the parameterization of terrestrial carbon cycle in the current ESMs. Biases and  
358 model spread are even larger in NPP compared with GPP, implying that the simulation  
359 uncertainty is much larger when the photosynthesis and the respiration are combined. [Unlike](#)

360 ~~the cases in temperature and precipitation, t~~The performance-pattern correlation of the MME  
361 in terms of GPP and NPP is not necessarily higher than that of the individual models in this  
362 case. ~~This suggests the, due to the~~ presence of similar type of systematic model persistent and  
363 ~~large~~ deficiencies in current CMIP5 ESMs, which is even larger than random individual model  
364 errors supposed to be cancelled out through the multi-model ensemble average. in the  
365 individual models. Individual models have the different bias patterns of GPP and NPP.  
366 Therefore, MME shows the good simulation skills for spatial distributions of GPP and NPP in  
367 CMIP5-ESMs.  
368

### 369 **3.2. Model Dependences**

370 The simulation of annual GPP values shows significant model dependence as shown in  
371 Figure 5. MRI-ESM1 shows the largest value among the models. The three models, ESM2G,  
372 ESM2 M, and MPI-ESM-LR, simulate relatively larger values of GPP than the rest of the  
373 models. As the simulation of Ra shows relatively small model dependence, models that  
374 simulate larger GPP values tend to produce larger NPP in general. MRI-ESM1 is an exception,  
375 and the simulated GPP of this model is significantly reduced by its large Ra, leading to an NPP  
376 value close to the median value. The two models, CESM1-BGC and NorESM1-ME, that share  
377 the same land surface model simulate the smallest NPP values, which is a significant  
378 underestimation relative to the MODIS estimate.

379 To examine further what causes the global bias in carbon fluxes, the spatial distribution of  
380 the GPP bias pattern in carbon fluxes simulated using each model is compared in Figure 7.  
381 Each model exhibits its own systematic biases. MRI-ESM1 shows a significant positive bias  
382 in most vegetated regions, which is particularly pronounced in tropical rainforests. The group  
383 of models with higher global-mean GPP values in Figure 5 (i.e., MPI-ESM1-LR, ESM2-M,

384 and ESM2G) shows GPP bias patterns that are remarkably similar to each other. GPP is  
385 overestimated in most regions in these models except for the upper inland region of the Amazon.  
386 The rest of the models show mixed spatial patterns of positive and negative biases. The large  
387 negative GPP bias in part of the Amazon is primarily responsible for the lowest global-mean  
388 GPP values, which are simulated by CanESM2 and BCC\_CSM1 M. The negative bias is clear  
389 in the boreal high-latitude regions above 40 N in the CESM1-BGC and NorESM1-ME models.  
390 The systematic biases in the models reflect the uncertainties in the parameterized carbon cycles,  
391 as well as in the simulated climates. [It is suspected that the parameterization should be more](#)  
392 [responsible. Mao et al. \(2010\) showed a quite similar bias pattern in GPP from their offline](#)  
393 [CLM4 experiment with observed climate forcing to the pattern of CESM1-BGC shown in this](#)  
394 [study \(e.g., positive over tropics and negative over northern hemisphere high latitudes\). This](#)  
395 [implies that the uncertainty in climate forcing is not a primary one for the GPP biases.](#)

396 Most models simulate larger production in the tropics, due to abundant rainfall and high  
397 temperatures, and smaller production in high latitudes due to less precipitation and low  
398 temperatures. As GPP is much larger in magnitude than Ra, the NPP bias pattern in each model  
399 is mostly dominated by that of GPP rather than Ra, leading to consistent patterns (cf. Figure 7  
400 and Figure 8). The two GFDL models implemented with the same LM3 land surface model  
401 (i.e., ESM2M and ESM2G) and the other two models that use CLM4 (CESM1-BGC and  
402 NorESM1-ME) show NPP biases with opposite signs in the boreal regions above 40 N,  
403 highlighting significant model differences in parameterizations of carbon fluxes due to  
404 vegetation.

405

### 406 **3.3. Carbon Use Efficiency**

407 The bias patterns of GPP and NPP simulated by the various ESMs presented in Figure 7 and



408 8 are the result of complicated feedbacks between the carbon cycle (mostly by terrestrial  
409 vegetation) and climate. As the magnitude of the bias is also a function of biomass, this study  
410 further compared carbon use efficiency by dividing NPP by GPP. This normalized carbon flux  
411 ratio can highlight the difference among simulations driven by parameterization differences in  
412 terrestrial carbon fluxes by vegetation. Moreover, CUE is one of the important factors  
413 controlling terrestrial carbon cycle, which is subject to change in future climate or land use. is  
414 ~~one of good indicator for measurement of carbon cycle over terrestrial region.~~ The spatial  
415 pattern of CUE obtained by MODIS shows significant variations (Figure 9). In MODIS, most  
416 tropical areas with high GPP values generally show low CUE values below 0.4, particularly  
417 over the Amazon, central Africa and Southeast Asia. In contrast, CUE is in general greater than  
418 0.5 over wide areas in high latitudes and a few low-latitude, high-elevation regions. The spatial  
419 distribution of CUE apparently depends on climate conditions such as precipitation and  
420 temperature in that regions with large amounts precipitation and warm climates show low CUE  
421 values, while regions experiencing dry and cold climates show high CUE values. Ise et al.  
422 (2010) and Bradford and Crowther (2013) suggested that CUE could be limited substantially  
423 by overly-sensitive autotropic respiration by plants in warm climate based on their  
424 observational studies. Overall, the MME of 10 ESMs tends to reproduce the observed  
425 distribution from MODIS reasonably well. However, the MME values are lower than the  
426 observed values in most regions, which can largely be attributed to the underestimation of CUE  
427 values by MRI-ESM1. The bias pattern of CUE differs strongly among the models. Note that  
428 the bias pattern of CUE tends to characterize the parameterization differences in the terrestrial  
429 carbon fluxes used in the ESMs. The bias patterns of CUE are almost identical to each other  
430 for models that share the same land surface model, such as BCC\_CSM1 and BCC\_CMS1-M,  
431 and ESM2-M and ESM2G, and CESM1-BGC and NorESM1-ME, respectively. The two BCC

432 models tend to overestimate CUE in Eurasia, North America, and Africa, while they produce  
433 underestimates in Australia and South America. CanESM2 shows a similar pattern as the two  
434 BCC models. MPI-ESM1-LR shows a similar bias structure except in that it produces  
435 overestimates in South America. CESM1-BGC, NorESM1-ME, and MRI-ESM1 exhibit an  
436 underestimation of CUE over most terrestrial regions.

437 The model dependence is depicted better by the zonal mean CUE distribution (Figure 10).  
438 The observed CUE values show a clear latitudinal dependence and generally increases with  
439 latitude. The zonal mean of CUE from MODIS ranges from 0.3 to 0.7, with a global average  
440 of 0.49. It indicates that the biomass in high latitudes tends to take up atmospheric carbon more  
441 efficiently compared with that in tropics. Even though the model spread is larger, the zonal  
442 mean MME is able to reproduce the observed relationship between CUE and latitude. Some  
443 models, such as CESM1-BGC, NorESM1-ME and MRI-ESM1, are notably different from the  
444 other models, as well as from MODIS, and simulate low values, particularly at middle to high  
445 latitudes. These results are consistent with those in Shao et al. (2013). They suggested that  
446 respiration decreases more rapidly than production in response to latitudinal decreases in mean  
447 temperature in all models except NorESM1-ME and CESM1-BGC. The reason for the  
448 underestimation of CUE in the two models are caused by their low estimates of NPP. Using the  
449 same data from MODIS, Zhang et al. (2009) suggested that there exists a clear relationship  
450 between CUE and climate conditions, such as surface air temperature and precipitation, that  
451 are critical for biomass growth.

452 Figure 11 compares the relationship from MODIS with the model simulations. The observed  
453 CUE from MODIS is more influenced by temperature than precipitation, as is particularly clear  
454 in dry regions with precipitation below 50 mm yr<sup>-1</sup>. In general, the observed CUE decreases  
455 with increasing temperature. Moreover, observed CUE values show the sensitivity of CUE to

456 precipitation in the tropics, where plant growth is more sensitive to precipitation compared  
457 with high latitudes. The MME basically follows this temperature sensitivity, although it tends  
458 to underestimate CUE. It is caused by the overestimation of Ra in most models compared with  
459 the MODIS estimates (Figure S3). Individual models show their own deficiencies. For example,  
460 the GFDL models (ESM2-M and ESM2G) tend to overestimate the sensitivity of CUE to  
461 precipitation in tropical regions compared with MODIS. It indicates that the gradients in CUE  
462 with temperature in the GFDL models are weaker than those in MODIS. In contrast, the models  
463 based on CLM4.0, such as CESM1-BGC, NorESM1-ME and MRI-ESM1, show a weaker  
464 sensitivity of CUE to both temperature and precipitation than the other models. This result  
465 might be caused by other limiting and trigger processes, such as nitrogen limitation, which are  
466 larger than the sensitivity to temperature and precipitation. This large divergence in the model  
467 sensitivity of CUE to temperature and precipitation induces differences in the atmospheric CO<sub>2</sub>  
468 concentrations in the future among the full coupled ESMs.

469 Figure 12 compares the observed values and differences among simulations in terms of CUE  
470 depending on the dominant PFTs according to the classification in Figure 1. In the MODIS  
471 observations, the CUE values over broadleaf forests (DBF and EBF) are generally lower than  
472 over needleleaf forests ~~which usually represents mostly to gymnosperms~~ (DNF and ENF),  
473 implying that dense forests tend to not only take up large amounts of atmospheric carbon for  
474 photosynthesis but also release large amounts of carbon to the atmosphere through respiration.  
475 In this regard, the efficiency of carbon uptake by the broadleaf forests is smaller than that of  
476 needleleaf forests.

477 The observed variations in CUE depending on the PFTs are reproduced realistically by the  
478 MME. The differences between MODIS and the MME is large in areas of DNF and DBF, but  
479 those vegetation types occupy relatively small fractions of the vegetated surface. The model

480 spread is large, regardless of plant function types. This is primarily due to the low CUE values  
481 produced by three of the models, CESM1-BGC, MRI-ESM1 and NorESM1-ME, for all of the  
482 plant function types. These three ESMs have their own unique formulations in parameterizing  
483 terrestrial carbon fluxes. In the case of MRI-ESM1, it determines the monthly Ra empirically  
484 based on a function of the surface air temperature and precipitation (Obata, 2007). The  
485 simulated NPP in MRI-ESM1 is the residual term between GPP and Ra that is evidently  
486 different from that of the other ESMs. The two CLM 4.0-based models, CESM1-BGC and  
487 NorESM1-ME, include coupled carbon and nitrogen (CN) cycles, which seems to lead to  
488 dramatic differences in CUE compared with the other models that do not represent interactions  
489 between the carbon and nitrogen cycles. Inclusion of the nitrogen cycle in the models tends to  
490 constrain the amount of carbon uptake in vegetated land surface (Zaehle et al., 2010;  
491 Friedlingstein et al., 2014) and produces higher simulated growth respiration than in other  
492 models (Shao et al., 2013).

493 To examine the impact of the CN cycle in the model further, this study conducted two  
494 additional sensitivity experiments using CESM1-BGC, one with interactive carbon-nitrogen  
495 cycle (CN) and the other with no nitrogen cycle (Only C). Figure 13 shows that CN tends to  
496 decrease GPP in most of areas compared with Only C, which suggests that the implementation  
497 of nitrogen cycle in this model reduces the amount of carbon uptake by vegetation drastically  
498 as a limiting factor. Accordingly NPP also tends to decrease in most of the regions at the  
499 decrease of GPP. It is interesting to see that CUE decrease is particularly significant in mid- to  
500 high-latitudes rather than in the tropics. This result is quite consistent with the simulation  
501 difference between the CN models (CESM1-BGC and NorESM1-ME) and the rest of ESMs  
502 (e.g., the zonal mean CUE shown in Figure 10).

503 This study further compares the observed and the MME-simulated CUE sensitivity to the

504 surface temperature for each plant function type (Figure 14). The MODIS observations show  
505 more scatter in CUE values for a given temperature, suggesting that the natural carbon cycle is  
506 not simply determined by temperature, but is also controlled by other factors. In most PFTs,  
507 the observed CUE is maintained close to or even higher than 0.6, particularly in low canopy  
508 plants such as SHR, CROP and GRA, for surface temperatures lower than 10 °C. CUE tends  
509 to decrease significantly at temperatures higher than 10 °C. This observed feature may be  
510 interpreted based on the ecological significance of the resistance to low temperatures by plants  
511 (Allen et al., 2010). Low temperatures tend to reduce biosynthetic production by plants and  
512 can even disturb vital functions to cause permanent injuries and death. The survival capacity  
513 of plants tries to make its metabolic processes continue to function under low temperature  
514 stresses and using its cold resistance (Larcher, 1968). It suggests that the CUE values of  
515 vegetation may be lowered in favorable environmental conditions, such as warm temperatures  
516 and abundant precipitation, as there is plenty of production and plant growth. Vegetation  
517 experiencing cold temperatures and insufficient precipitation adapts to climate for growth and  
518 maintenance survive by increasing CUE.

519 In contrast, even though the multi-model ensemble average is taken for the various ESMs,  
520 the simulated CUE variation shows a clearer change with temperature, suggesting that the  
521 parameterization of the terrestrial carbon cycle in current ESMs depends too much on  
522 temperature conditions. A decreasing trend is clear in the MME regardless of PFTs in response  
523 to an increase in temperature. From the MME simulation results, CUE values in all PFTs shows  
524 a clear linear change in response to temperature variation. This implies that the current models  
525 do not adequately consider the observed ecological resistance to temperature, and the balance  
526 between respiration and production in the models is more simplified than the observations. In

527 fact, the parameterizations of most land surface models are based on conceptual leaf-level  
528 formulations, such as those used in the calculation of biochemical photosynthesis processes  
529 and the dependence of CO<sub>2</sub> exchange on stomatal conductance, which use temperature and soil  
530 moisture explicitly in their formulations. The comparison results in this study suggest that the  
531 models might need to consider ecosystem-level parameterizations which simulate carbon and  
532 nitrogen fluxes and vegetation and soil pools and are estimated at a long (e.g., monthly) time  
533 step based on spatially explicit information on climate, ecosystem type, soil type, and elevation  
534 (Zhu and Zhuang, 2015) to reflect the nonlinear relationship for the interaction between climate  
535 condition and vegetation.

536

#### 537 **4. Summary and Concluding Remarks**

538 The simulations of climate and the terrestrial carbon cycle have been examined by comparing  
539 surface temperatures and precipitation, as well as GPP, Ra, and NPP values, simulated by 10  
540 different CMIP5 ESMs with the CRU surface observational data for climate-related variables  
541 and the MODIS satellite estimates for the carbon cycle over 6 years (2000-2005).

542 Despite the systematic biases with significant hemispheric differences, the spatial  
543 distributions of temperature and precipitation, which are closely related to biogeochemical  
544 variables (Rahman et al., 2005; Yang et al., 2006), are relatively similar when compared with  
545 observations. More model discrepancies appeared in the simulation of the carbon cycle, which  
546 reflects overestimation of GPP over most of the globe. The terrestrial carbon fluxes simulated  
547 by the ESMs are diverse, and the models exhibit large spread, even though the multi-model  
548 ensemble mean (MME) shows strong resemblance in terms of its spatial distribution to the  
549 observed pattern by cancelling out the systematic biases in each model. The results show that  
550 the biases of terrestrial carbon fluxes are due less to the bias in the spatial distribution of climate

551 conditions but more to the larger uncertainty in their parameterizations.

552 We also analyzed carbon use efficiency (CUE) by dividing NPP by GPP, which is a  
553 physiological parameter defined as the proportion of carbon acquisition (e.g., GPP) to  
554 vegetation growth (NPP). ~~Actually, the MODIS gridded GPP and NPP are not data are not based~~  
555 ~~on in-situ flux observations but derived from satellite radiances and the perfect observation~~  
556 ~~data. Even though, MODIS GPP and NPP are based on the light use model. with satellite~~  
557 ~~foreing data~~ However, these are the best and only available data for the validation of . ~~It is best~~  
558 ~~and only one data to evaluate~~ global distribution of CUE simulated by in-ESMs. ~~For evaluation~~  
559 ~~of MODIS data compared with site based observation data.~~ In Table S1, ~~we compared carbon~~  
560 ~~use efficiency (CUE)~~ CUE from our studies and previous studies ~~which are that used the site-~~  
561 ~~based observation data in table S1.~~ DNF ~~is shows~~ highest CUE values in ~~this our study, which~~  
562 ~~is consistent well with and at the findings in H-~~ previous studies. In addition, the plants with short  
563 ~~canopy height (SHR, GRA and CROP) are show the value the needleleaf forests (ENF, DNF)~~  
564 ~~show the values is relatively higher than those of other PFTs consistently in all studies.~~  
565 ~~Therefore, MODIS satellite data is reasonable to use evaluation of gridded ESMs.~~ Analyzing  
566 CUE help us to understand the carbon storage in simulated terrestrial ecosystem in ESMs. At  
567 first, the spatial distribution of observed CUE from space (e.g., MODIS) depends on climate  
568 condition such as precipitation and temperature. For example, the regions of large precipitation  
569 and warm climate show low CUE, while the regions of dry and cold climate show high CUE.  
570 It indicates that CUE at the regions with warm temperature and abundant precipitation could  
571 be lowered as there is a plenty of production and plant growth. The vegetation in cold  
572 temperature and insufficient precipitation adapts to the environmental condition for survival  
573 by increasing CUE.

574 In ~~different contrast~~ with MODIS, we found clear difference of CUE between ESMs. The

575 bias pattern of two ESMs from BCC showed the hemispheric contrast to positive in NH and  
576 negative in SH. The strong negative bias of CUE over southern hemisphere is shown in GFDL's  
577 models. The CUE in ESMs based on CLM4 (e.g., CESM-BGC and NorESM-ME) ~~are-is~~  
578 significantly underestimated globally. This large uncertainty of CUE in individual models is  
579 influenced by biogeochemical parameterization of land surface model. In the MME, the spatial  
580 distribution of CUE is reasonably simulated. However, ~~s~~Strong negative bias is found over  
581 Amazon, ~~which is -It is~~ caused ~~by that~~ unbalanced ratio of GPP and Ra ~~in the terrestrial carbon~~  
582 ~~fluxes~~ over tropical forest such as evergreen broadleaf forest ~~in~~ the most models. The inverse  
583 relationship between temperature and CUE is reasonably simulated in the MME over dry  
584 regions. Generally, Ra is more sensitive to temperature than GPP in the real world over a certain  
585 range of temperatures (Woodwell et al., 1990; Ryan, 1991; Piao et al., 2010). It ~~means-suggests~~  
586 that the sensitivity of temperature to photosynthesis is weaker than that of respiration (Arnone  
587 and Korner, 1997; Enquist et al., 2007). Actually, the sensitivity of CUE is not only a function  
588 of temperature (Tucker et al., 2013) but also a function of nitrogen availability (Zha et al.,  
589 2013). This might lead to a non-linearity and complex relationship between CUE and  
590 temperature in the real case. However, most ESMs in CMIP5 do not consider the nitrogen cycle  
591 except CESM-BGC and NorESM. Most existing ESMs tend to adjust the vegetation growth  
592 by the minimum of carbon, water, light limitation based on Farquhar et al. (1980). Moreover,  
593 ESMs adapted the nitrogen cycle are not perfect in their parameterizations. For instance,  
594 nitrogen fluxes and amounts are too much dependent on carbon fluxes and amount in the  
595 models.

596

597 The CUE variation depending to the PFTs, MME is realistically reproduced in every PFTs.

598 The model spread is large. It indicates a wide spread due to the different PFTs in each land



599 models and systematic bias such as failure of PFT description in land models. The observed  
600 CUE values show a reasonable degree of non-linearity in terms of its response to temperature.  
601 In contrast, the stronger sensitivity of CUE to temperature increases in the MME is reflected  
602 by the systematic biases of simulated biogeochemical processes which depends on temperature  
603 conditions strongly in every PFTs.

604 However, most of the advanced ESMs have adopted leaf-scale biogeochemistry which  
605 involves parameterizations of photosynthesis and respiration based on small spatio-temporal  
606 scales that depend on laboratory experiments and limited in situ studies. It makes up one of the  
607 major uncertainties of carbon cycle processes in future climate change simulations from recent  
608 advanced ESMs. Atkin et al. (2008) suggested that most biogeochemical models are adjusted  
609 and incomplete parameterizations of biogeochemical processes. Due to the lack of  
610 observational data, many biogeochemical studies have focused on the total amount of primary  
611 production and respiration. Therefore, understanding and evaluating the global-scale  
612 ecosystem is challenging, based on the leaf scale biogeochemical parameterization used in the  
613 models. This leaf-level parameterization for biogeochemical processes is insufficient for long-  
614 term simulations (Zaehle et al., 2014). [For development of terrestrial parameterization of  
615 global-scale ecosystem, more fine spatial and temporal in-situ observation data are necessary.](#)  
616 For realistic long-term simulations, such as climate change experiments including the carbon  
617 cycle and feedback processes, parameterizations representing idealized and generalized  
618 ecosystem-level processes are needed, rather than site-specific and leaf-level processes.

619

620

## 621 **Acknowledgement**

622 This study is supported Basic Science Research Program through the National Research  
623 Foundation of Korea (NRF), funded by the Ministry of Education, Science and Technology

624 (2012M1A2A2671851) and the Supercomputing Center/Korea Institute of Science and  
625 Technology Information with supercomputing resources including technical support (KSC-  
626 2015-C3-035).

627

628

629

630 **References**

631 [Amthor, J. S.: The McCree–de Wit–Penning de Vries–Thornley respiration paradigms: 30](#)  
632 [years later, \*Annals of Botany\*, 86, 1–20, 2000.](#)

633 Anav A., Friedlingstein, P., Kidston, M., Bopp, L., Ciais, P., Cox, P., Jones, C., Jung, M.,  
634 Myrneni, R., and Zhu, Z.: Evaluating the land and ocean components of the global carbon cycle  
635 in the CMIP5 Earth System Models, *J. Clim.*, 26, 6801–6843, doi:10.1175/JCLI-D-12-00417.1,  
636 2013.

637 Allen, C. D., Macalady, A. K., Chenchouni, H., Bachelet, D., McDowell, N., Vennetier, M.,  
638 Kitzberger, T., Rigling, A., Breshears, D. D., Hogg, E. H., Gonzalez, P., Fensham, R., Zhang,  
639 Z., Castro, J., Demidova, N., Lim, J. H., Allard, G., Running, S. W., Semerci, A., Cobb, N.: A  
640 global overview of drought and heat-induced tree mortality reveals emerging climate change  
641 risks for forests, *For. Ecol. Manage.*, 259, 660–684, doi:10.1016/j.foreco.2009.09.001, 2010.

642 Andres, R. J., Gregg, J. S., Losey, L., Marland, G., and Boden: Monthly, global emissions of  
643 carbon dioxide from fossil fuel consumption, *Tellus B*, 63, 309–327, doi:10.1111/j.1600-  
644 0889.2011.00530.x, 2011.

645 Arnone III, J. A., Körner, C.: Temperature adaptation and acclimation potential of leaf dark  
646 respiration in two species of *Ranunculus* from warm and cold habitats, *Arct. Antract. Alp. Res.*,  
647 29, 122-125, doi:10.2307/1551842, 1997.

648 Arora, V. K., Boer, G. J., Friedlingstein, P., Eby, M., Jones, C. D., Christian, J. R., Bonan,  
649 G., Bopp, L., Brovkin, V., Cadule, P., Hajima, T., Ilyina, T., Lindsay, K., Tjiputra, J. F., Wu, T.:  
650 Carbon–concentration and carbon–climate feedbacks in CMIP5 earth system models, *J. Clim.*,  
651 26, 5289-5314, doi:10.1175/JCLI-D-12-00494.1, 2013.

652 Atkin, O. K., Atkinson, L. J., Fisher, R. A., Campbell, C. D., Zaragoza-Castells, J., Pitchford,  
653 J. W., Woodward, F. I., Hurry, V.: Using temperature-dependent changes in leaf scaling

654 relationships to quantitatively account for thermal acclimation of respiration in a coupled  
655 global climate–vegetation model, *Glob. Change Biol.*, 14, 2709–2726, doi:10.1111/j.1365-  
656 2486.2008.01664.x, 2008.

657 Booth, B. B. B., Jones, C. D., Collins, M., Totterdell, I. J., Cox, P. M., Sitch, S., Huntingford,  
658 C., Betts, R. A., Harris, G. R., and Lloyd, J.: High sensitivity of future global warming to land  
659 carbon cycle processes, *Environ. Res. Lett.*, 7, 024002, doi:10.1088/1748-9326/7/2/024002,  
660 2012.

661 [Choudhury, B. J.: Carbon use efficiency, and net primary productivity of terrestrial  
662 vegetation, \*Adv. Space Res.\*, 26, 1105–1108, 2000.](#)

663 Collatz, G. J., Ribas-Carbo, M., and Berry, J. A.: Coupled photosynthesis-stomatal  
664 conductance model for leaves of C4 plants, *Aust. J. Plant Physiol.*, 19, 519–538,  
665 doi:10.1071/PP9920519, 1992.

666 De Lucia, E. H., Drake, J. E., Thomas, R. B., and Gonzalez-Meler, M.: Forest carbon use  
667 efficiency: is respiration a constant fraction of gross primary production? *Glob. Chang. Biol.*,  
668 13, 1157–1167, doi:10.1111/j.1365-2486.2007.01365.x, 2007.

669 Dewar, R. C., Medlyn, B. E., and McMurtrie, R. E.: Acclimation of the respiration  
670 photosynthesis ratio to temperature: insights from a model, *Glob. Chang. Biol.*, 5, 615–622.  
671 doi:10.1046/j.1365-2486.1999.00253.x, 1999.

672 Enquist B. J., Kerhoffer, A. J., Stark, S. C., Swenson, N. G., McCarthy M. C., and Price, C. A.:  
673 A general integrative model for scaling plant growth, carbon flux, and functional trait spectra,  
674 *Nat.* 449, 218-222, doi:10.1038/nature06061, 2007.

675 Farquhar, G. D., von Caemmerer, S., and Berry, J. A.: A biochemical model of photosynthetic  
676 CO<sub>2</sub> assimilation in leaves of C<sub>3</sub> species, *Planta*, 149, 78–90, doi:10.1007/BF00386231, 1980.

677 Friedlingstein, P., Cox, P., Betts, R., Bopp, L., von Bloh, W., Brovkin, V., Cadule, P., Doney,

678 S., Eby, M., Fung, I., Bala, G., John, J., Jones, C., Joos, F., Kato, T., Kawamiya, M., Knorr, W.,  
679 Lindsay, K., Matthews, H. D., Raddatz, T., Rayner, P., Reick, C., Roeckner, E., Schnitzler, K.  
680 G., Schnur, R., Strassmann, K., Weaver, A. J., Yoshikawa, C., and Zeng, N.: Climate–carbon  
681 cycle feedback analysis: Results from the C4MIP model intercomparison, *J. Clim.*, 19, 3337–  
682 3353, doi:10.1175/JCLI3800.1, 2006.

683 Friedlingstein, P., Meinshausen, M., Arora, V. K., Jones, C. D., Anav, A., Liddicoat, S. K.,  
684 and Knutti, R.: Uncertainties in CMIP5 climate projections due to carbon cycle feedbacks, *J.*  
685 *Clim.*, 27, 511–525, doi:10.1175/JCLI-D-12-00579.1, 2014.

686 Friedlingstein, P., Fung, I., Holland, E., John, J., Brasseur, G., Erickson, D., and Schimel, D.:  
687 On the contribution of CO<sub>2</sub> fertilization to the missing biospheric sink, *Global Biogeochem.*  
688 *Cycles*, 9, 541–556, doi:10.1029/95GB02381, 1995.

689 Gifford, R.M.: The global carbon-cycle – a viewpoint on the missing sink, *Aust. J. Plant*  
690 *Physiol.*, 21, 1–15, doi:10.1071/PP9940001, 1994.

691 Harris, I., Jones, P. D., Osborn, T. J., and Lister, D. H.: Updated high-resolution grids of  
692 monthly climatic observations – the CRU TS3.10 Dataset, *Int. J. Climatol.*, 34, 623–642,  
693 doi:10.1002/joc.3711, 2014.

694 Heinsch, F. A., Zhao, M. S., Running, S. W., Kimball, J. S., Nemani, R. R., Davis, K. J.,  
695 Bolstad, P. V., Cook, B. D., Desai, A. R., Ricciuto, D. M., Law, B. E., Oechel, W. C., Kwon,  
696 H., Luo, H. Y., Wofsy, S. C., Dunn, A. L., Munger, J. W., Baldocchi, D. D., Xu, L. K., Hollinger,  
697 D. Y., Richardson, A. D., Stoy, P. C., Siqueira, M. B. S., Monson, R. K., Burns, S. P., and  
698 Flanagan, L. B.: Evaluation of remote sensing based terrestrial productivity from MODIS using  
699 regional tower eddy flux network observations, *IEEE Trans. Geosci. Remote Sens.*, 44,  
700 1908–1925, doi:10.1109/TGRS.2005.853936, 2006.

701 Hoffman, F. M., Randerson, J. T., Arora, V. K., Bao, Q., Cadule, P., Ji, D., Jones, C. D.,

702 Kawamiya, M., Khatiwala, S., Lindsay, K., Obata, A., Shevliakova, E., Six, K. D., Tjiputra, J.  
703 F., Volodin, E. M., and Wu, T.: Causes and implications of persistent atmospheric carbon  
704 dioxide biases in Earth System Models, *J. Geophys. Res. Biogeosci.*, 119, 141-162, doi:  
705 10.1002/2013JG002381, 2013.

706 Jung, M., Reichstein, M., Margolis, H. A., Cescatti, A., Richardson, A. D., Arain, M. A.,  
707 Arneth, A., Bernhofer, C., Bonal, D., Chen, J. Q., Gianelle, D., Gobron, N., Kiely, G., Kutsch,  
708 W., Lasslop, G., Law, B. E., Lindroth, A., Merbold, L., Montagnani, L., Moors, E. J., Papale,  
709 D., Sottocornola, M., Vaccari, F., and Williams, C.: Global patterns of land-atmosphere fluxes  
710 of carbon dioxide, latent heat, and sensible heat derived from eddy covariance, satellite, and  
711 meteorological observations, *J. Geophys. Res.*, 116, G00J07, doi:10.1029/2010JG001566, 2011.

712 King, A. W.: Atmosphere: Plant respiration in a warmer world, *Sci.*, 312, 536,  
713 doi:10.1126/science.1114166, 2006.

714 Larcher, W. and Mair, B.: Das Kälteresistenzverhalten von *Quercus pubescens*, *Ostrya*  
715 *carpinifolia* und *Fraxinus ornus* auf drei thermisch unterschiedlichen Standorten, *Oecol. Plant.*,  
716 3, 255–270, 1968.

717 Leith, C. E.: Climate response and fluctuation dissipation, *J. Atmos. Sci.*, 32, 2022-2026,  
718 doi:10.1175/1520-0469(1975)032<2022:CRAFD>2.0.CO;2, 1975.

719 [Mao, J. Thornton, P. E. and Shi, X.: Remote Sensing Evaluation of CLM4 GPP for the Period](#)  
720 [2000–09, \*J. Clim.\*, 25, 5327-5342, 2012.](#)

721 Monteith, J.: Solar radiation and productivity in tropical ecosystems, *J. Appl. Ecol.*, 9, 747-  
722 766, doi:10.2307/2401901, 1972.

723 Obata, A.: Climate carbon cycle model response to freshwater discharge into the North  
724 Atlantic, *J. Clim.*, 20, 5962–5976, doi:10.1175/2007JCLI1808.1, 2007.

725 Piao, S., Luysaert, S., Ciais, P., Janssens, I. A., Chen, A., Cao, C., Fang, J., Friedlingstein,

726 P., Luo, Y., and Wang, S.: Forest annual carbon cost: a global-scale analysis of autotrophic  
727 respiration, *Ecol.*, 91, 652–661, doi:10.1890/08-2176.1, 2010.

728 Rahman, A. F., Sims, D. A., Cordova, V. D., and El-Masri, B. Z.: Potential of MODIS EVI  
729 and surface temperature for directly estimating per-pixel ecosystem C fluxes, *Geophys. Res.*  
730 *Lett.*, 32, L19404, doi:10.1029/2005GL024127, 2005.

731 Running, S.W. and Gower, S.T.: FOREST-BGC, a general model of forest ecosystem  
732 processes for regional applications. II. Dynamic carbon allocation and nitrogen budgets, *Tree*  
733 *Physiol.*, 9, 147–160, doi:10.1093/treephys/9.1-2.14, 1991.

734 Ryan, M. G.: Effects of climate change on plant respiration. *Ecol. Appl.*, 1, 157–167, doi:  
735 10.2307/1941808, 1991.

736 Shao P., Zeng, X., Sakaguchi, K., Monson, R. K., and Zeng, X.: Terrestrial carbon cycle:  
737 climate relations in eight CMIP5 earth system models, *J. Clim.*, 26, 8744-8764,  
738 doi:10.1175/JCLI-D-12-00831.1, 2013.

739 [Taylor, K. E.: Summarizing multiple aspects of model performance in a single diagram, \*J.\*](#)  
740 [Geophys. Res.](#), 106, 7183-7192, doi: 10.1029/2000JD900719, 2001.

741 Taylor, K. E., Stouffer, R. J., and Meehl, G. A.: An overview of CMIP5 and the experiment  
742 design, *Bull. Amer. Meteor. Soc.*, 93, 485–498, doi:0.1175/BAMS-D-11-00094.1, 2012.

743 [Tucker, C. L., Bell, J., Pendall, E., Ogle, K.: Does declining carbon-use efficiency explain](#)  
744 [thermal acclimation of soil respiration with warming?, \*Glob. Change Biol.\*, 19, 252–263,](#)  
745 [2013.](#)

746 [Turner, P. D., Ritts, W. D., Zhao, M., Kurc, S. A., Dunn, A. L., Wofsy, S. C., Small, E. E.,](#)  
747 [and Running, S. W.: Assessing Interannual Variation in MODIS-Based Estimates of Gross](#)  
748 [Primary Production, \*IEEE Trans. Geosci. Remote Sens.\*, 44, 1899-1907, 2006.](#)

749 Todd-Brown, K. E. O., Randerson, J. T., Post, W. M., Hoffman, F. M., Tarnocai, C., Schuur,

750 E. A. G., and Allison, S. D.: Causes of variation in soil carbon simulations from CMIP5 earth  
751 system models and comparison with observations, *Biogeosci.*, 10, 1717–1736, doi:10.5194/bg-  
752 10-1717-2013, 2013.

753 Williams, D. N., Lawrence, B. N., Lautenschlager, M., Middleton, D., and Balaji, V.: The  
754 earth system grid federation: delivering globally accessible petascale data for CMIP5, *Proc. of*  
755 *the 32nd Asia-Pacific Advanced Network Mtg.*, doi:10.7125/APAN.32.15, 2011.

756 Woodwell, G. M.: The effects of global warming, In J. Leggett, editor, *Global warming: the*  
757 *Greenpeace report*, Oxford Univ. Press, Oxford, UK, 116-132, 1990.

758 Yang, W., Shabanov, N. V., Huang, D., Wang, W., Dickinson, R. E., Nemani, R. R.,  
759 Knyazikhin, Y., and Myneni, R. B.: Analysis of leaf area index products from combination of  
760 MODIS Terra and Aqua data, *Remote Sens. Environ.*, 104, 297-312,  
761 doi:10.1016/j.rse.2006.04.016, 2006.

762 Zaehle, S., Medlyn, B. E., De Kauwe, M. G., Walker, A. P., Dietze, M. C., Hickler, T., Luo,  
763 Y., Wang, Y. P., El-Masri, B., Thornton, P., Jain, A., Wang, S., Warlind, D., Weng, E., Parton,  
764 W., Iversen, C. M., Gallet-Budynek, A., McCarthy, H., Finzi, A., Hanson, P. J., Prentice, I. C.,  
765 Oren, R., and Norby, R. J.: Evaluation of 11 terrestrial carbon–nitrogen cycle models against  
766 observations from two temperate Free-Air CO<sub>2</sub> Enrichment studies, *New phytol.*, 202, 803-  
767 822, doi:10.1111/nph.12697, 2014.

768 [Zha, T. S., Barr, A. G., Bernier, P. -Y., Lavigne, M. B., Trofymow, J. A., Amiro, B. D.,](#)  
769 [Arain, M. A., Bhatti, J. S., Black, T. A., Margolis, H. A. McCaughey, J. H., Xing, Z. S., VanRees,](#)  
770 [K. C. J., Coursolle, C.: Gross and aboveground net primary production at Canadian forest](#)  
771 [carbon flux sites, \*Agricul. and Fore. Meteorol.\*, 174–175: 54–64, 2013.](#)

772 Zhang, Y., Yu, J. G., Yang, J., Wimberly, M. C., Zhang, X., Tao, J., Jiang, Y., and Zhu, J.:  
773 Climate-driven global changes in carbon use efficiency, *Glob. Ecol. Biogeogr.*, 23, 144–155,



774 doi:10.1111/geb.12086, 2014.

775 Zhang, Y., Xu, M., Chen, H., and Adams, J.: Global pattern of NPP to GPP ratio derived  
776 from MODIS data: effects of ecosystem type, geographical location and climate, *Glob. Ecol.*  
777 *Biogeogr.*, 18, 280–290, doi:10.1111/j.1466-8238.2008.00442.x, 2009.

778 Zhao, F. and Zeng, N.: Continued increase in atmospheric CO<sub>2</sub> seasonal amplitude in the  
779 21st century projected by the CMIP5 Earth System Models, *Earth Syst. Dynam.*, 5, 423-439,  
780 doi:10.5194/esd-5-423-2014, 2014.

781 Zhao, M. S., Heinsch, F. A., Nemani, R. R., and Running, S.W.: Improvements of the  
782 MODIS terrestrial gross and net primary production global data set, *Remote Sens. Environ.*,  
783 95, 164–176, doi:10.1016/j.rse.2004.12.011, 2005.

784 Zhu Q. and Zhuang Q.: Ecosystem biogeochemistry model parameterization: Do more flux  
785 data result in a better model in predicting carbon flux? *Ecosphere*, 6, 283, doi:10.1890/ES15-  
786 00259.1, 2015.

**Table 1. List of ESMS used in this study and their features**

| Number | Models      | Modeling center                                              | Horizontal resolution | ESM Reference       | Land model | Photosynthesis                                   | Autotropic Respiration | Nitrogen Cycle | Dynamic Vegetation |
|--------|-------------|--------------------------------------------------------------|-----------------------|---------------------|------------|--------------------------------------------------|------------------------|----------------|--------------------|
| 1      | BCC-CSM 1   | Beijing Climate Center, China                                | 2.812° × 2.812°       | Wu et al. (2013)    | BCC-AVIM1  | Farquhar et al., (1980)                          | Foley et al. (1996)    | No             | No                 |
| 2      | BCC-CSM 1M  | Beijing Climate Center, China                                | 1.125° × 1.125°       | Wu et al. (2013)    | BCC-AVIM1  | Farquhar et al., (1980)<br>Collatz et al. (1992) | Foley et al. (1996)    | No             | No                 |
| 3      | CanESM2     | Canadian Centre for Climate Modeling and Analysis, Canada    | 2.812° × 2.812°       | Arora et al. (2011) | CTEM       | Farquhar et al., (1980)<br>Collatz et al. (1992) | Ryan (1991)            | No             | No                 |
| 4      | CESM1 - BGC | Community Earth System Model Contributors, NSF-DOE-NCAR, USA | 1.25° × 0.9°          | Long et al. (2013)  | CLM4       | Farquhar et al., (1980)<br>Collatz et al. (1992) | Foley et al. (1996)    | Yes            | No                 |
| 5      | GFDL-ESM2M  | NOAA Geophysical Fluid Dynamics Laboratory, USA              | 2.5° × 2°             | Dunne et al. (2013) | LM3        | Farquhar et al., (1980)<br>Collatz et al. (1992) | Foley et al. (1996)    | No             | Yes                |
| 6      | GFDL-ESM2G  | NOAA Geophysical Fluid Dynamics Laboratory, USA              | 2.5° × 2°             | Dunne et al. (2013) | LM3        | Farquhar et al., (1980)<br>Collatz et al. (1992) | Ryan (1991)            | No             | Yes                |

|    |             |                                                                                                                                                        |                 |                        |                     |                                                  |                     |     |     |
|----|-------------|--------------------------------------------------------------------------------------------------------------------------------------------------------|-----------------|------------------------|---------------------|--------------------------------------------------|---------------------|-----|-----|
| 7  | MIROC-ESM   | Japan Agency for Marine-Earth Science and Technology, Atmosphere and Ocean Research Institute, and National Institute for Environmental Studies, Japan | 2.812° × 2.812° | Watanabe et al. (2011) | MATSIR O+ SEIB-DGVM | Farquhar et al., (1980)                          | Ryan (1991)         | No  | No  |
| 8  | MPI-ESM LR  | Max Planck Institute for Meteorology, Germany                                                                                                          | 2.812° × 2.812° | Ilyina et al. (2013)   | JSBACH              | Farquhar et al., (1980)                          | Obata (2007)        | No  | Yes |
| 9  | MRI-ESM1    | Meteorological Research Institute, Japan                                                                                                               | 1.125° × 1.125° | Yukimoto et al. (2011) | HAL                 | Farquhar et al., (1980)<br>Collatz et al. (1992) | Ryan (1997)         | No  | No  |
| 10 | NorES M1-ME | Norwegian Climate Centre, Norway                                                                                                                       | 2.5° × 1.875°   | Tjiputra et al. (2013) | CLM4                | Farquhar et al., (1980)<br>Collatz et al. (1992) | Foley et al. (1996) | Yes | No  |

789

790

791

792

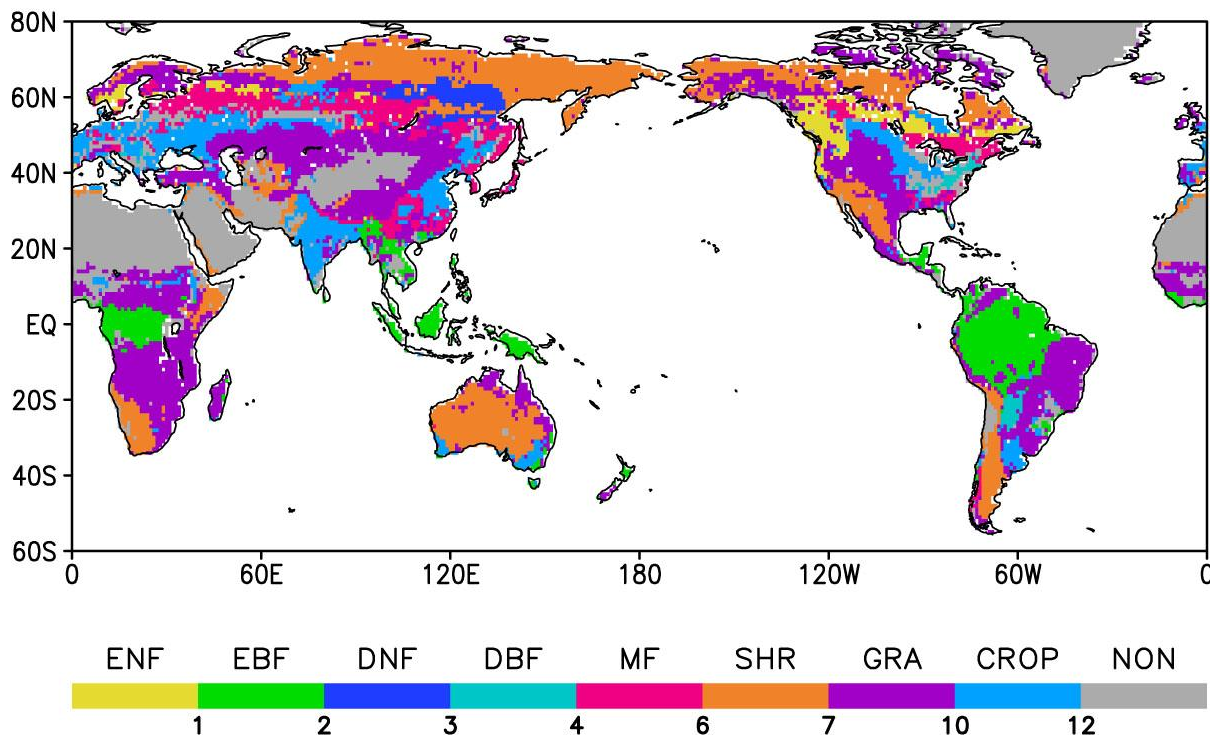

794

795 **Figure 1.** Horizontal distribution of dominant plant function types (PFTs) using the MODIS  
796 land cover data that include evergreen needleleaf forest (ENF), evergreen broadleaf forest  
797 (EBF), deciduous needleleaf forest (DNF), deciduous broadleaf (DBF), mixed forest (MF),  
798 shrub land (SHR), grass (GRA), cropland (CROP) and non-vegetated area (NON).

799

800

801

802

803

804

805

806

807

808

809

810

811

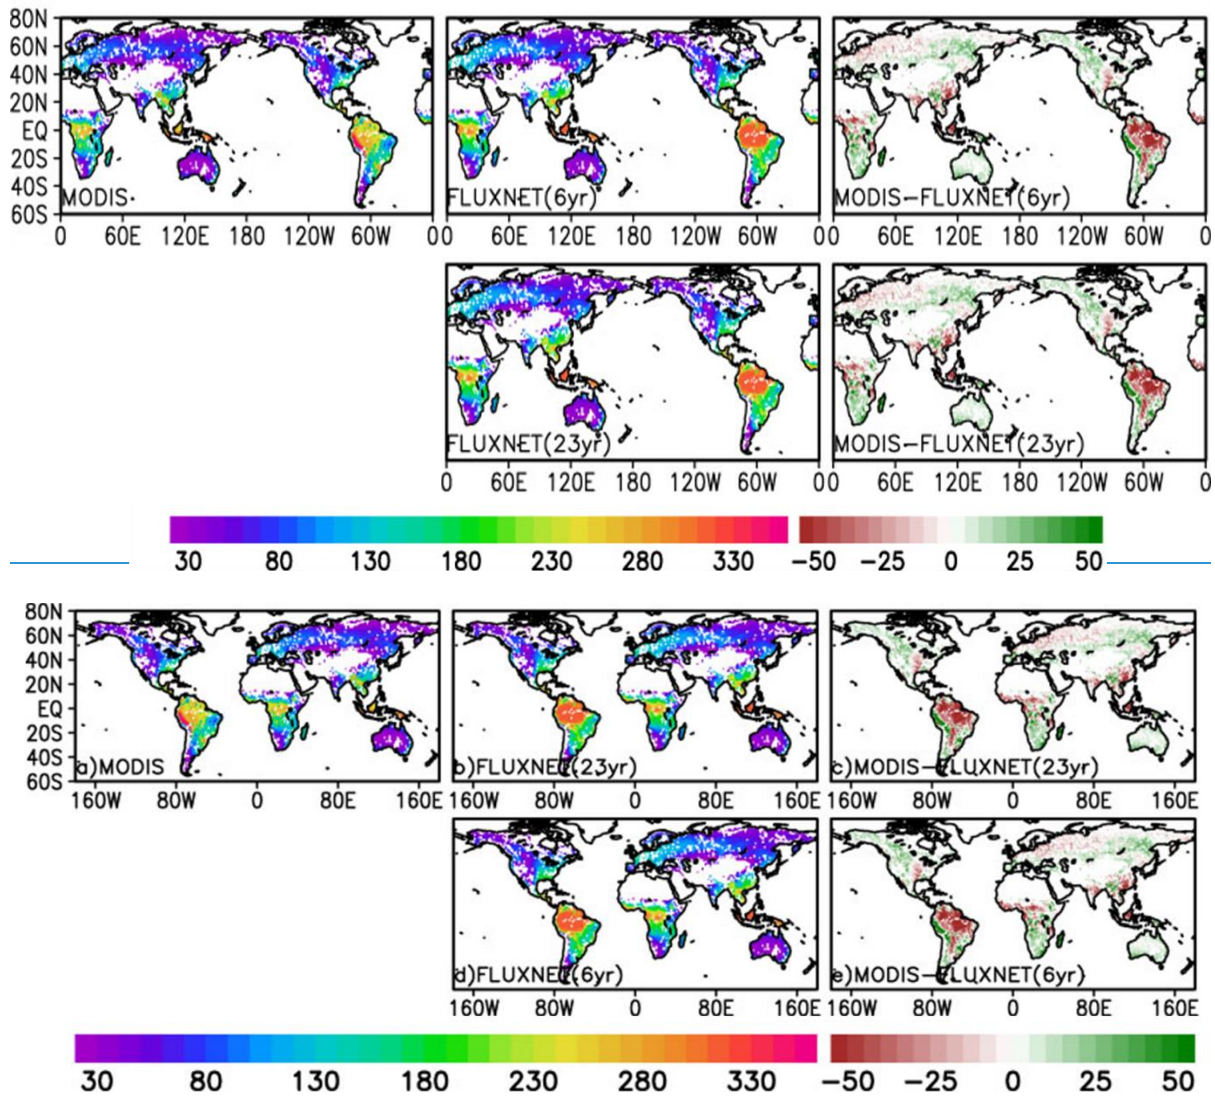

812

813

814 **Figure 2.** Spatial distributions of annual-mean GPP from MODIS (upper left), FLUXNET  
815 (upper middle), and MODIS minus FLUXNET (upper right) averaged for 236 years  
816 (2000+1983-2005). Bottom panels show the GPP from FLUXNET averaged for 236 years  
817 (2000+1983-2005, bottom left), and its difference from MODIS averaged for 6 years (bottom  
818 right). The unit is  $\text{gC m}^2 \text{mon}^{-1}$ .

819

820

821

822

823

824

825

826

827

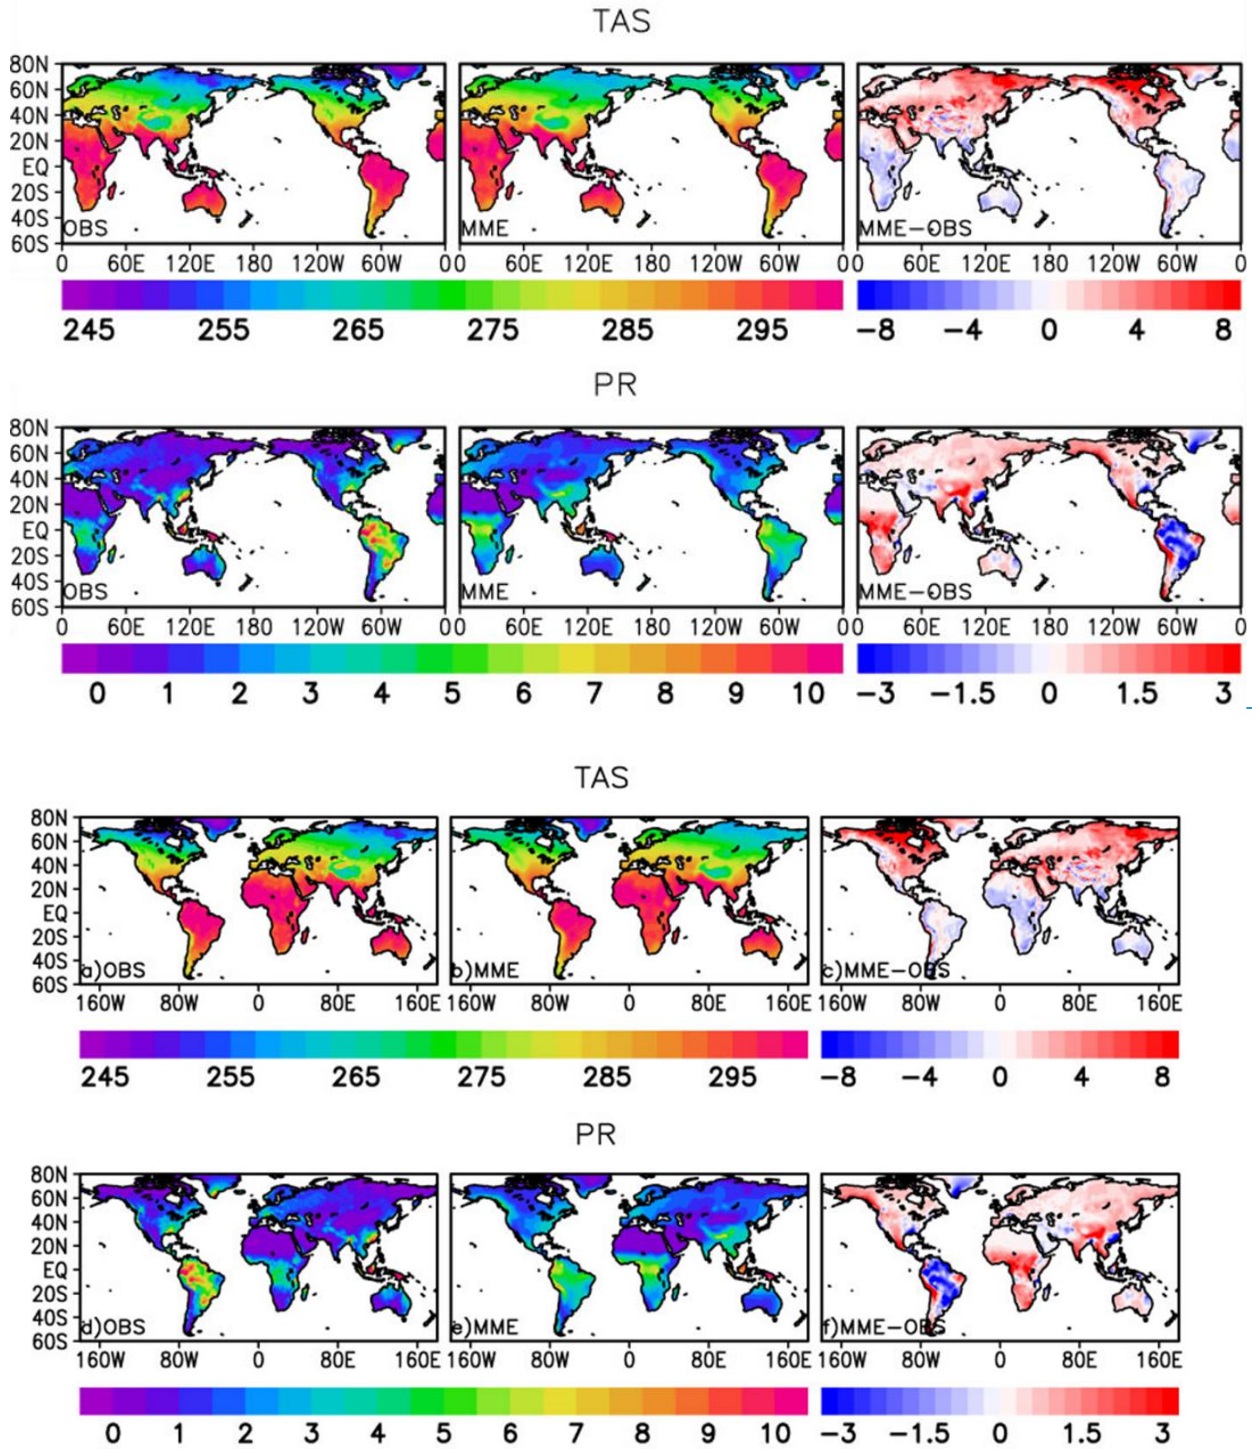

829

830

831 **Figure 3.** Annual-mean surface air temperature (top panels, unit: K) and precipitation (bottom  
 832 panels, mm d<sup>-1</sup>) averaged for 2000-2005 from the CRU observations (left), and the multi-model  
 833 ensemble (MME) mean (middle), and the model biases (MME minus CRU, right).





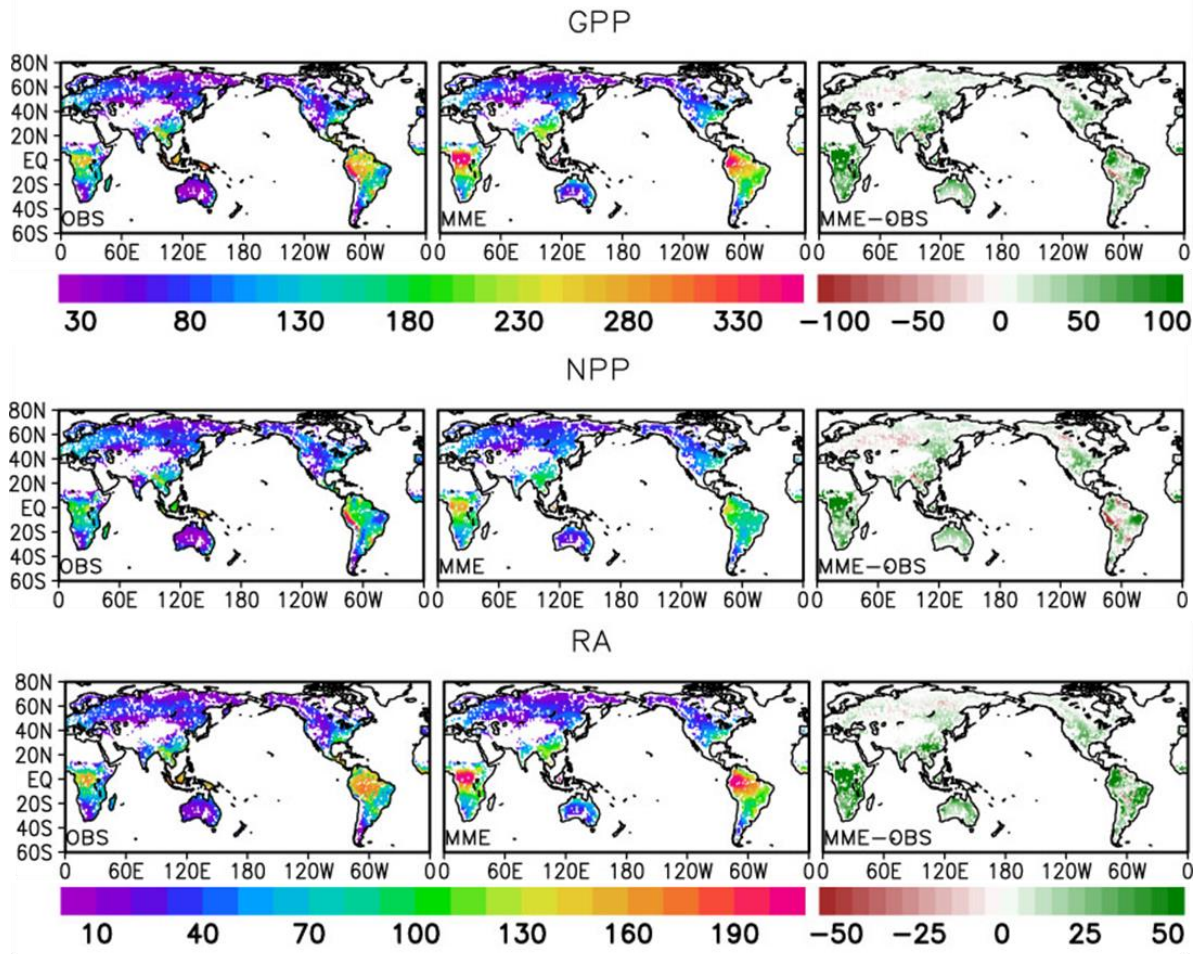

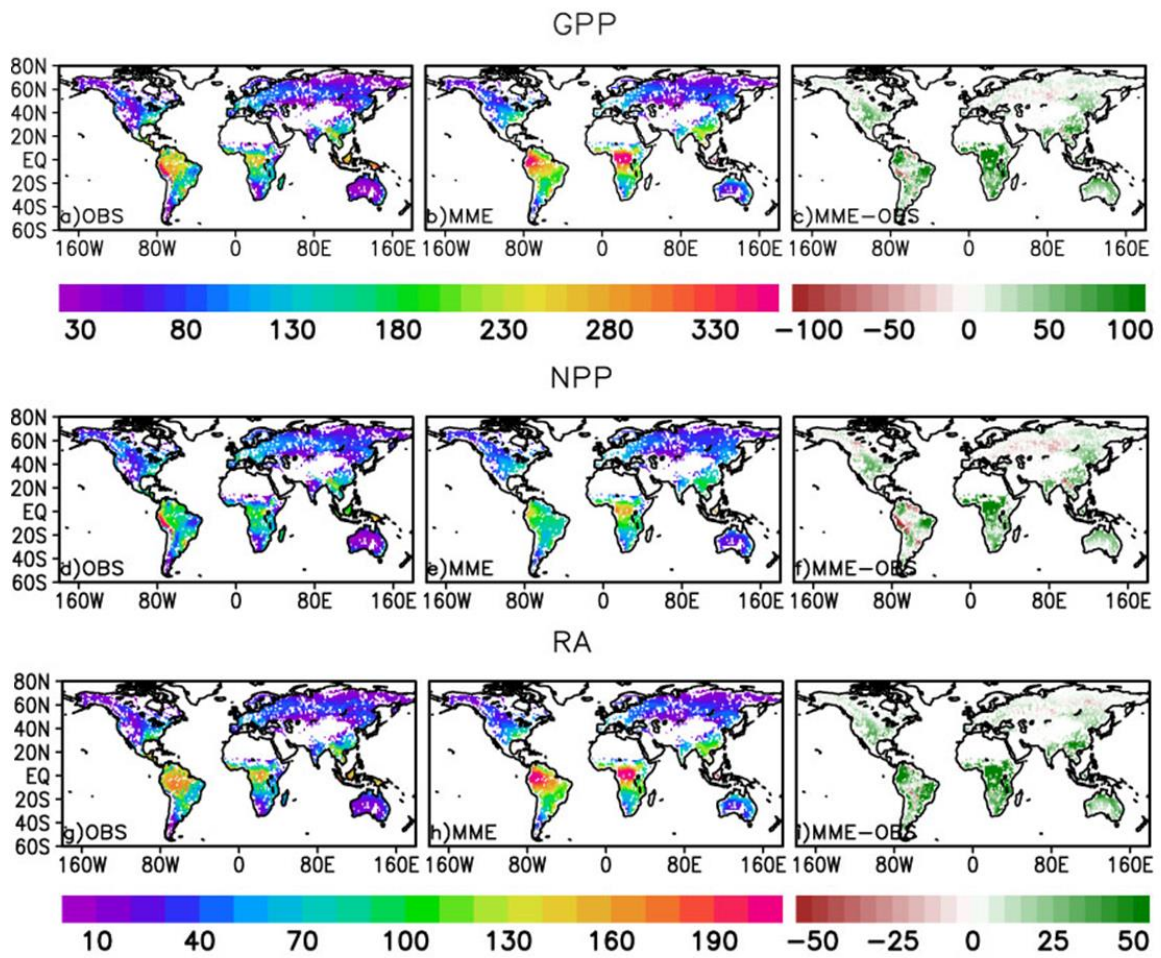

837

838 **Figure 4.** Same as in Figure. 3 except GPP (top), NPP (middle), and Ra (bottom) from the  
 839 MODIS observations and MME. The unit is  $\text{gC m}^2 \text{mon}^{-1}$ .

840

841

842

843

844

845

846

847

848

849  
850

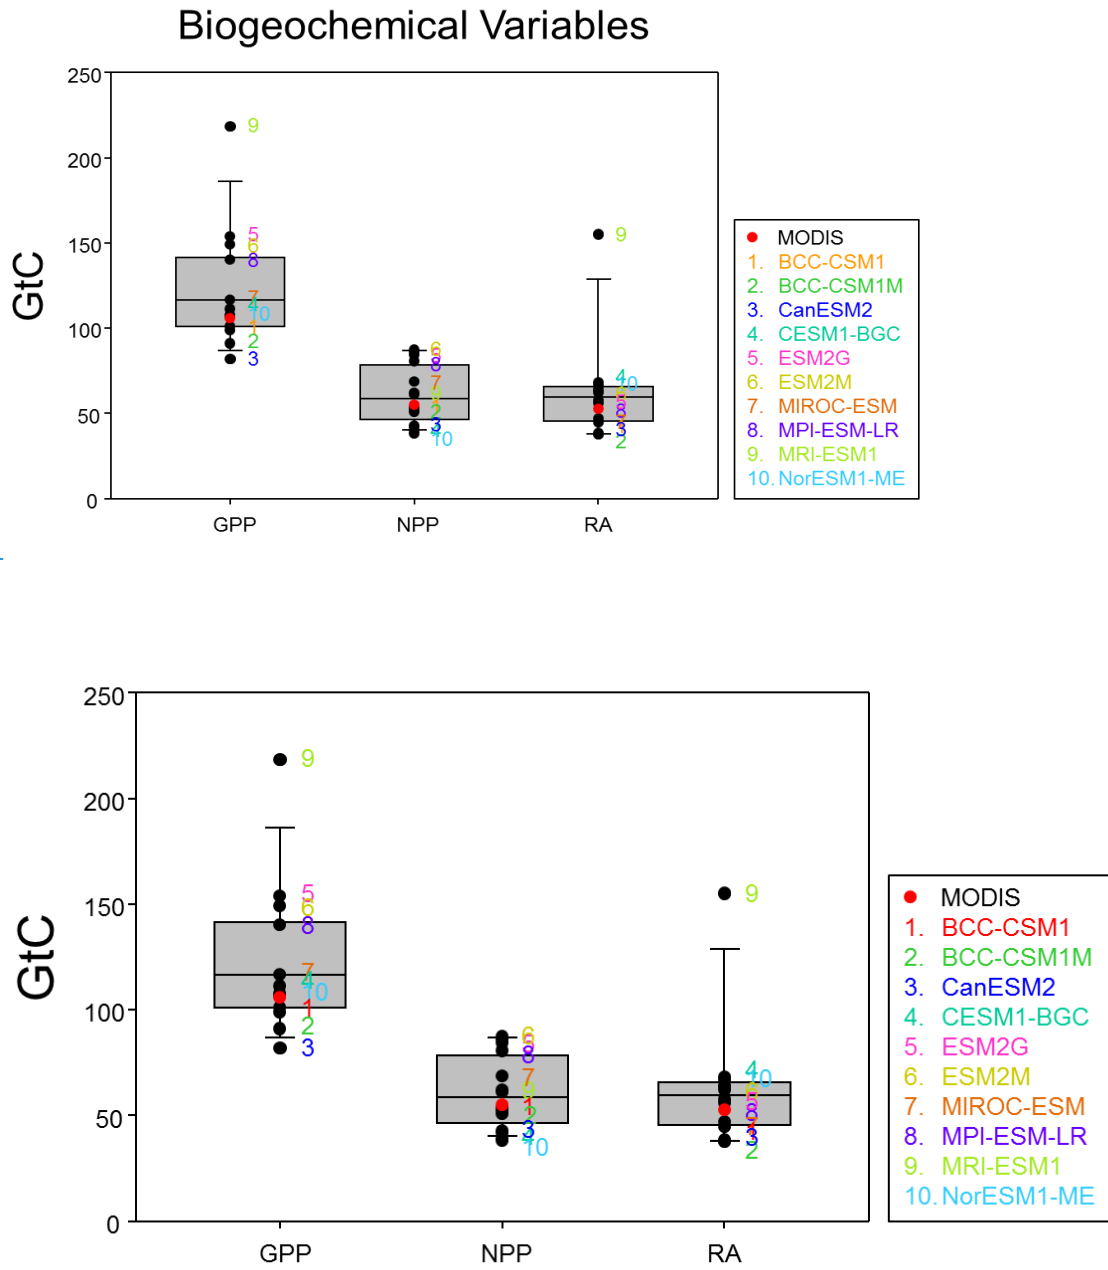

851

852

853 **Figure 5.** Global-mean values of GPP, NPP and Ra from MODIS and CMIP5 ESMs. The  
854 values are the average over the land grids only with latitude weighting for the period of 2000  
855 – 2005.

856

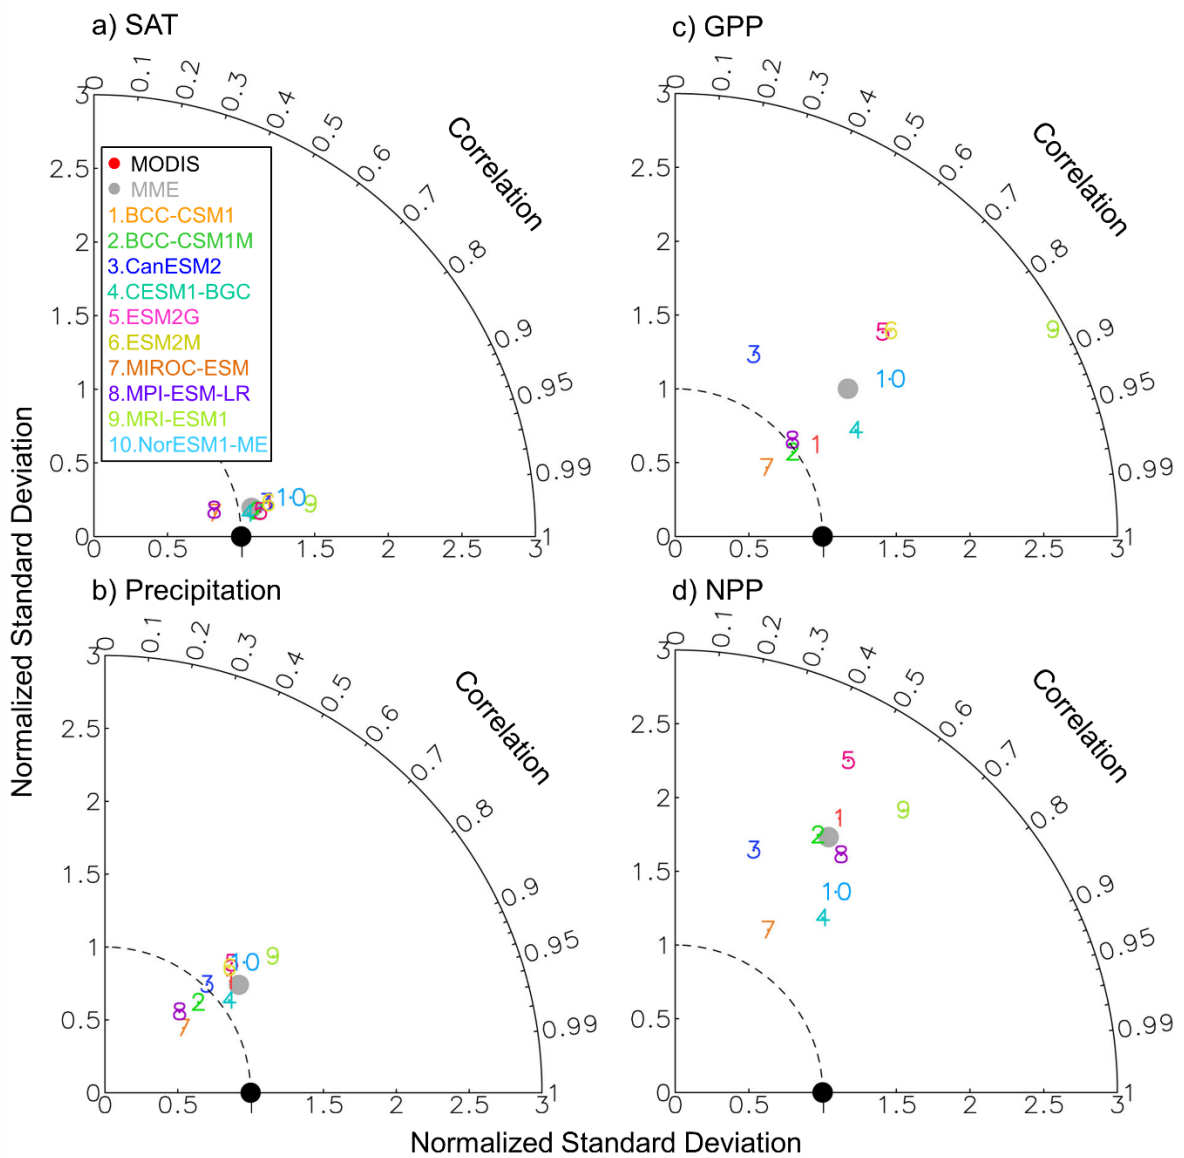

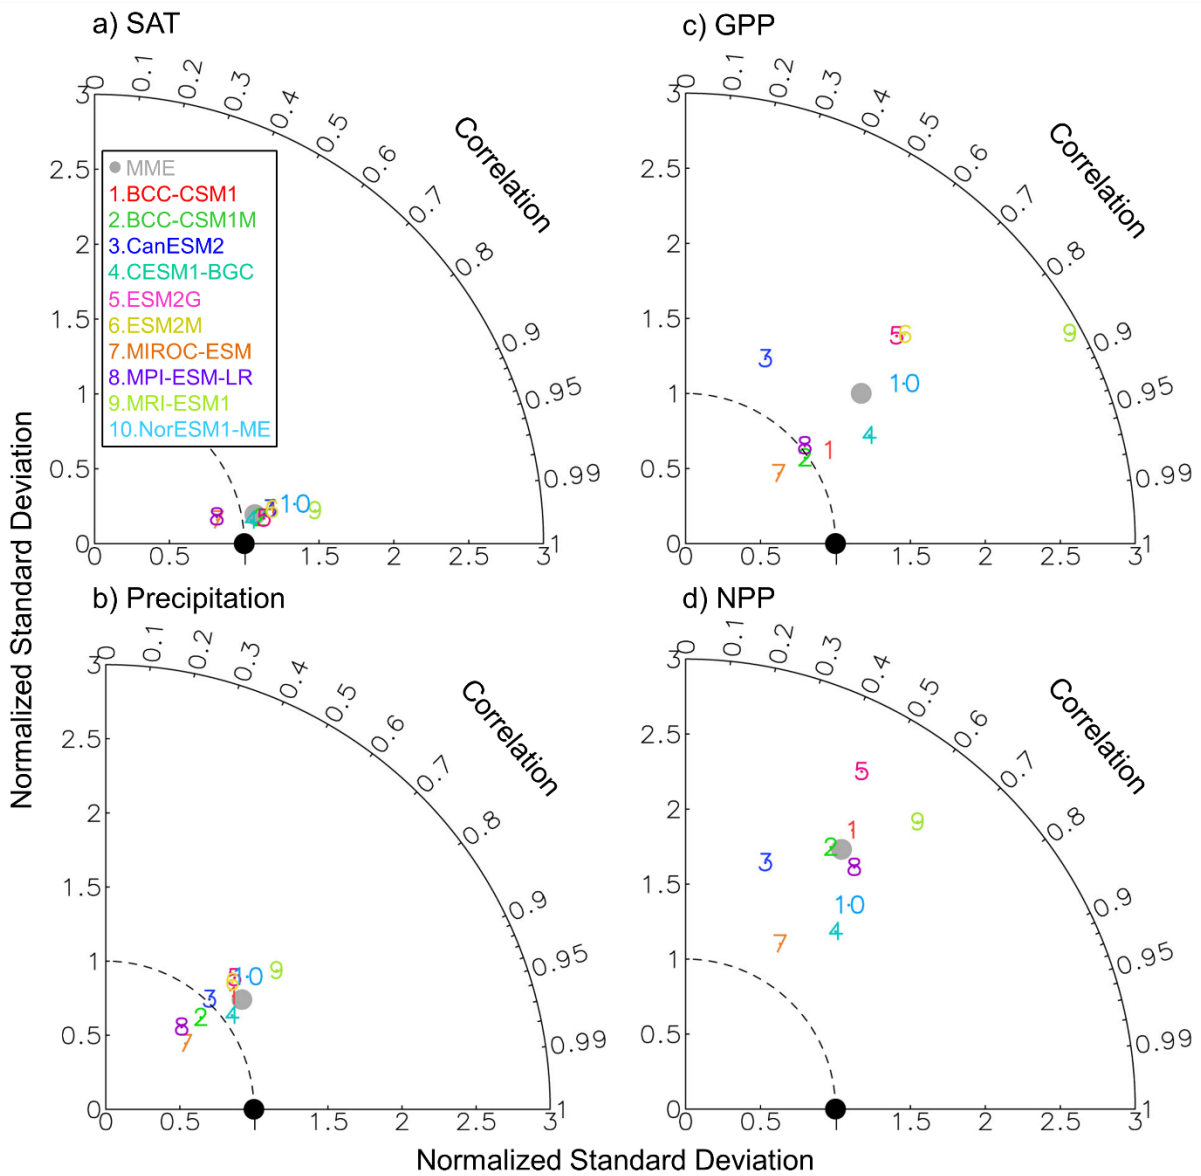

859

860 **Figure 6.** Taylor diagram of CMIP5 ESMs for annual-mean distribution of (a) surface air  
 861 temperature, (b) precipitation, (c) gross primary production (GPP) and (d) net primary  
 862 production (NPP) with respect to the corresponding observations for 6 years (2000-2005). Only  
 863 the vegetated grid points were included. The observed values are from CRU for temperature  
 864 and precipitation are MODIS for GPP and NPP.

865

866

867

868

869

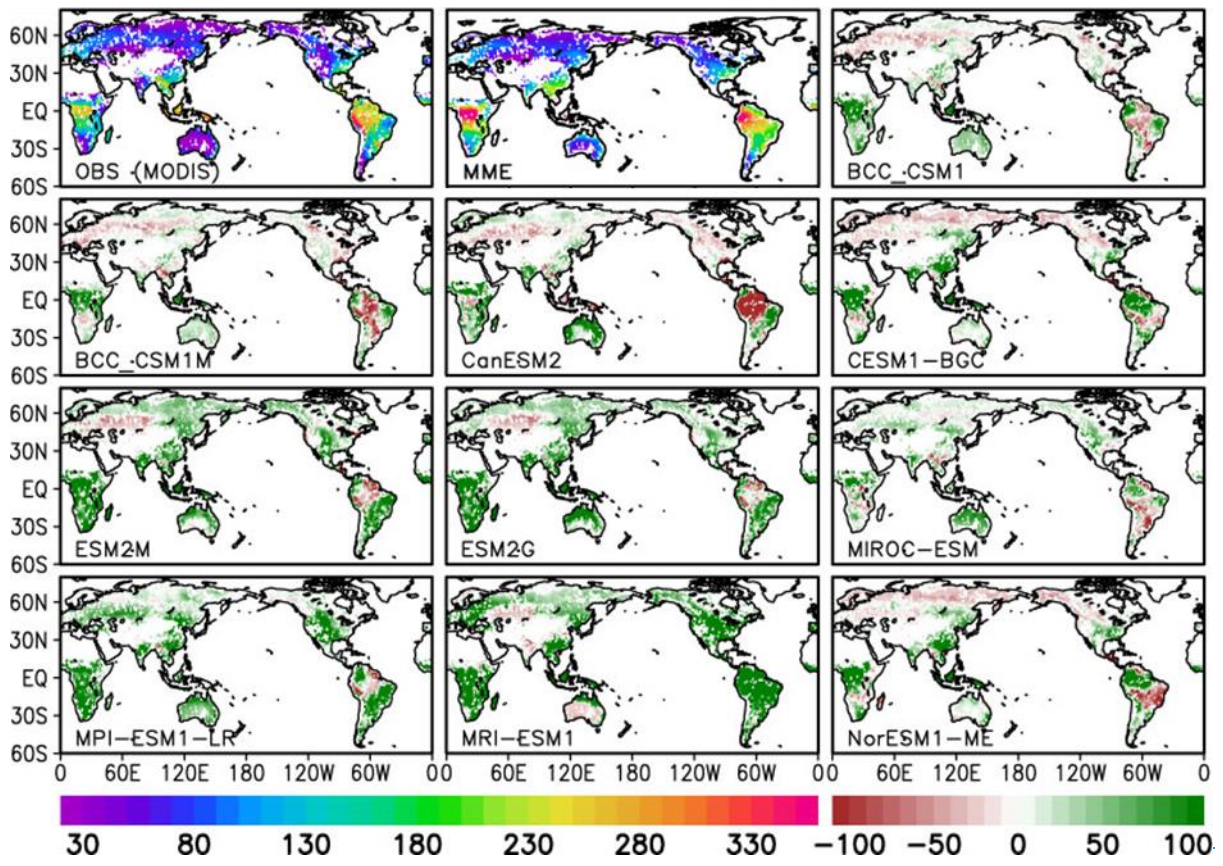

870

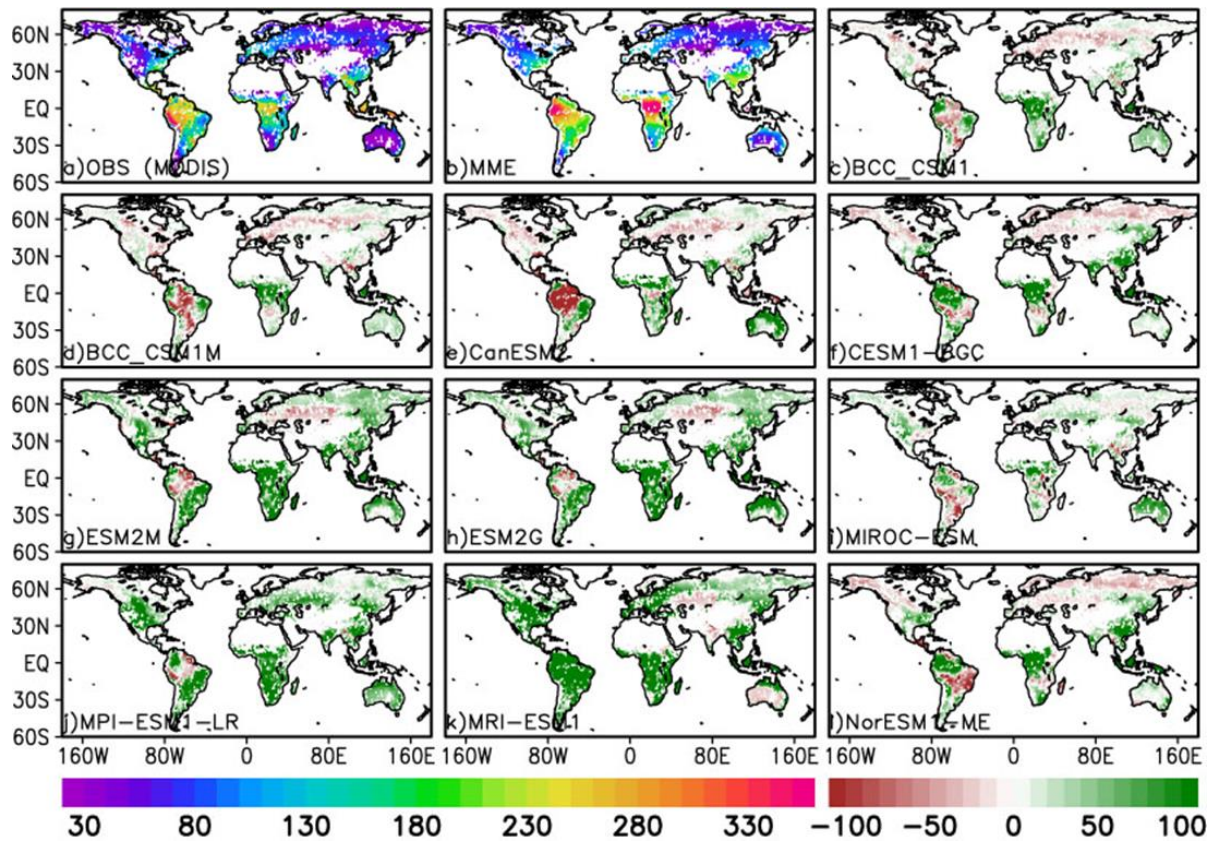

871

872

873

874

875

**Figure 7.** Spatial distribution of annual GPP from the MODIS observation (top left), MME (top middle) and the simulation bias in each model (model minus MODIS). The unit is  $\text{gC m}^2 \text{mon}^{-1}$ .

876

877

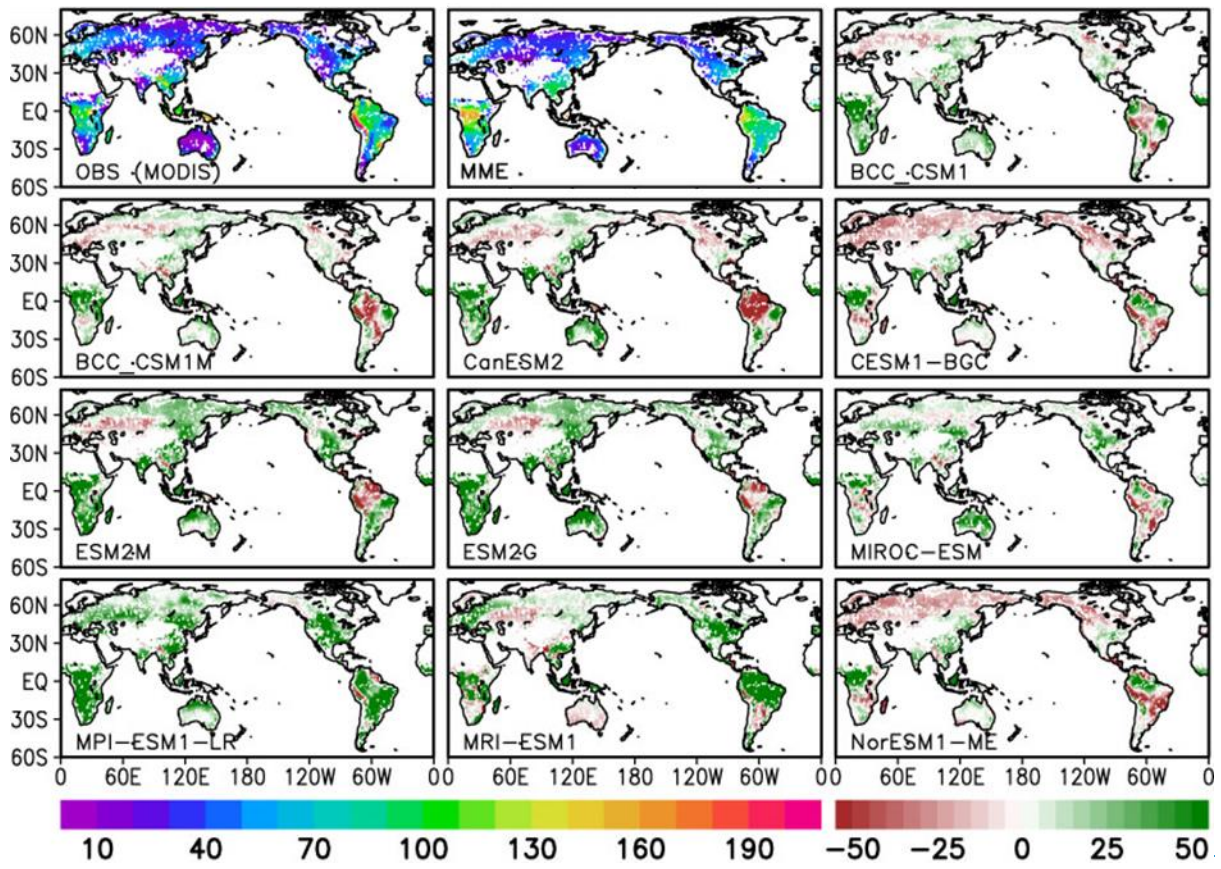

878



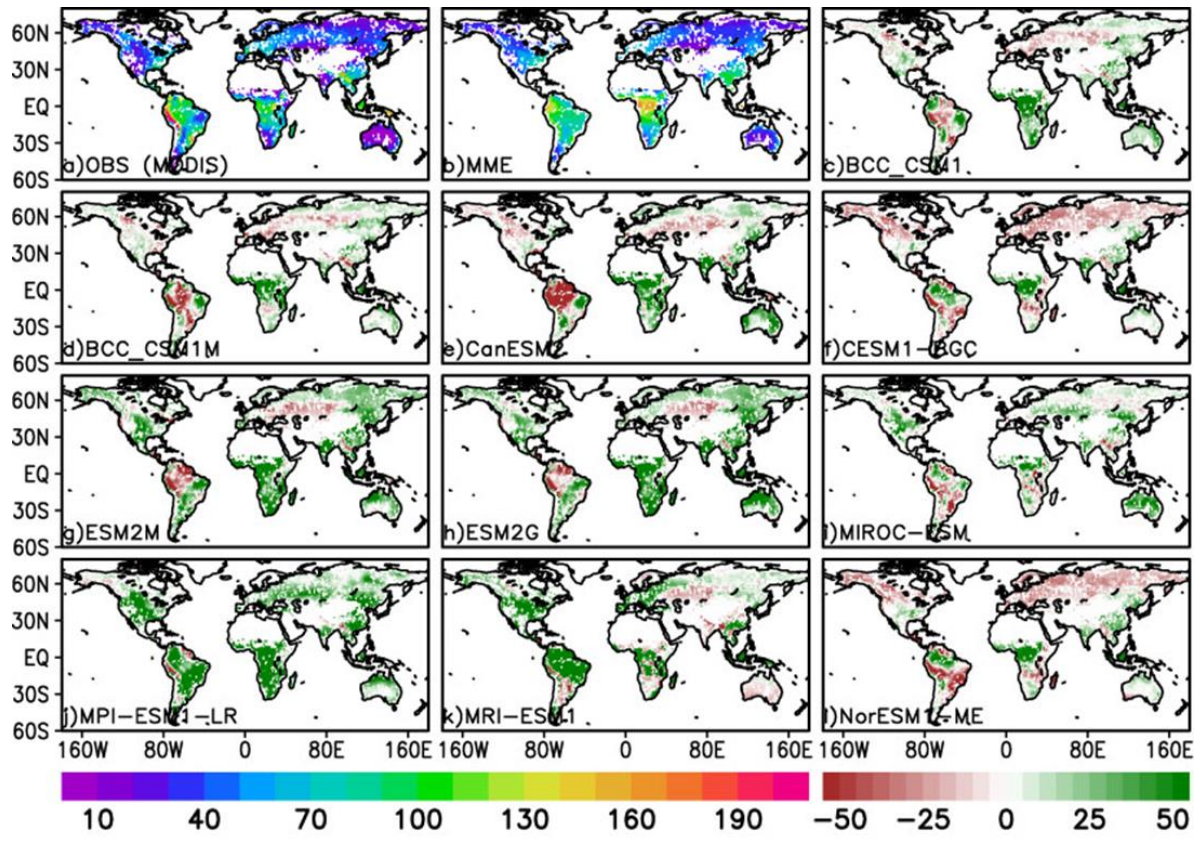

879

880 **Figure 8.** Spatial distribution of annual NPP from the MODIS observation (top left), MME  
 881 (top middle) and the simulation bias in each model (model minus MODIS). The unit is  $\text{gC m}^2$   
 882  $\text{mon}^{-1}$ .

883

884

885

886

887

888

889

890

891

892

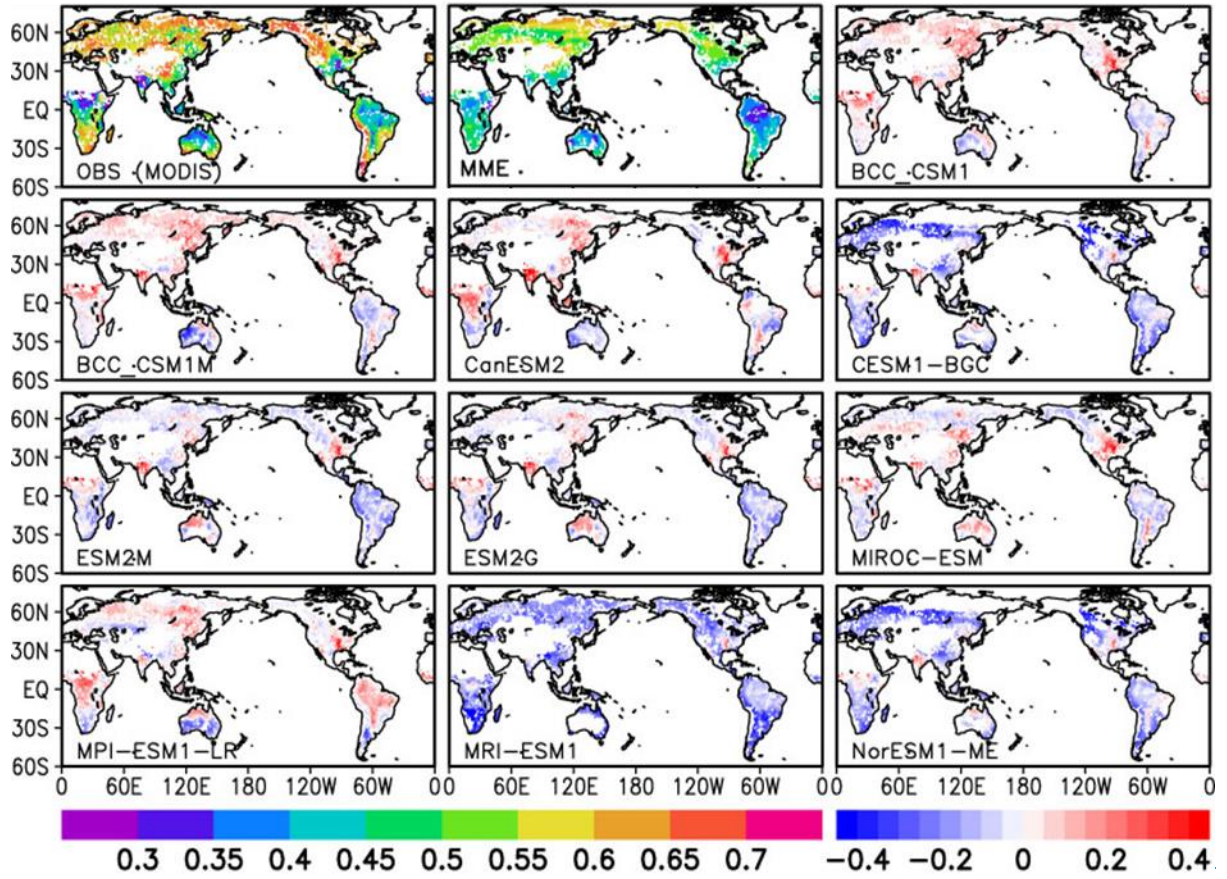

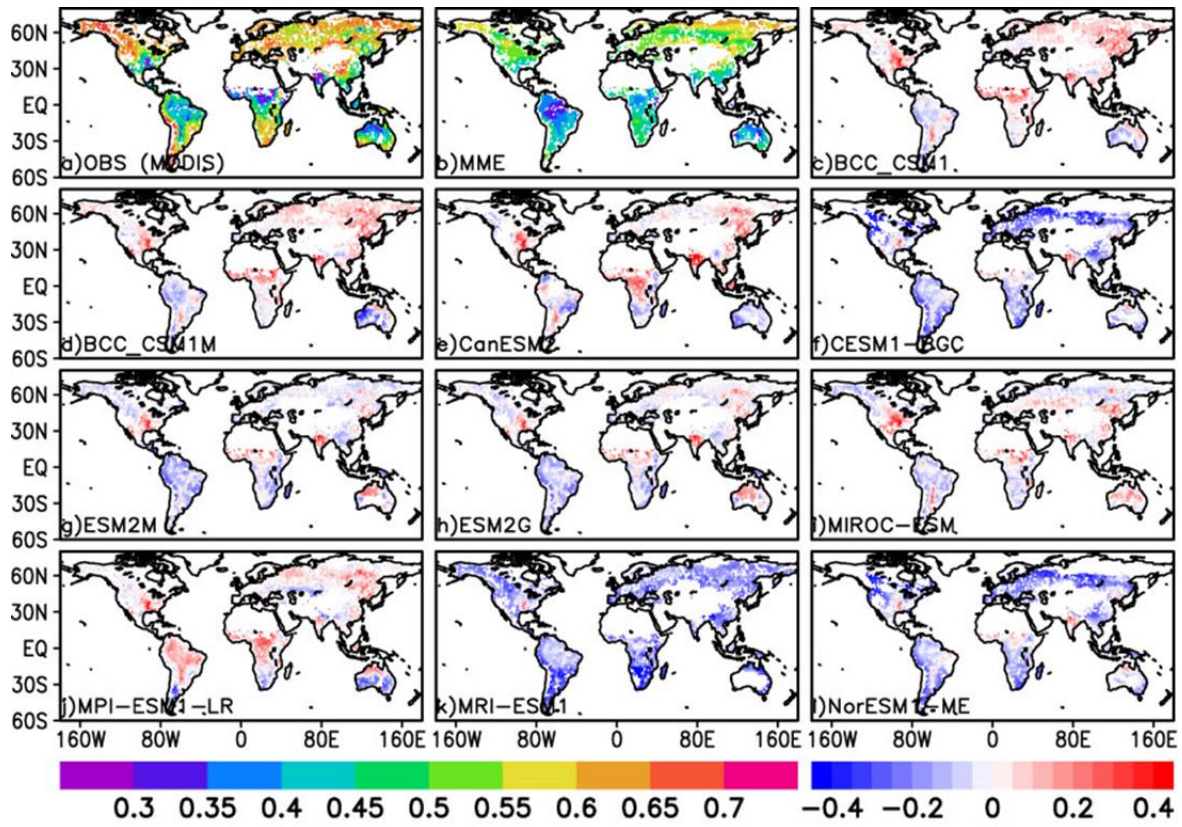

895

896

897

898

899

900

901

902

903

904

905

906

907

**Figure 9.** Spatial distribution of annual CUE from the MODIS observation (top left), MME (top middle) and the simulation bias in each model (model minus MODIS). CUE is a positively-defined ratio as NPP divided by GPP and less than or equal to 1.

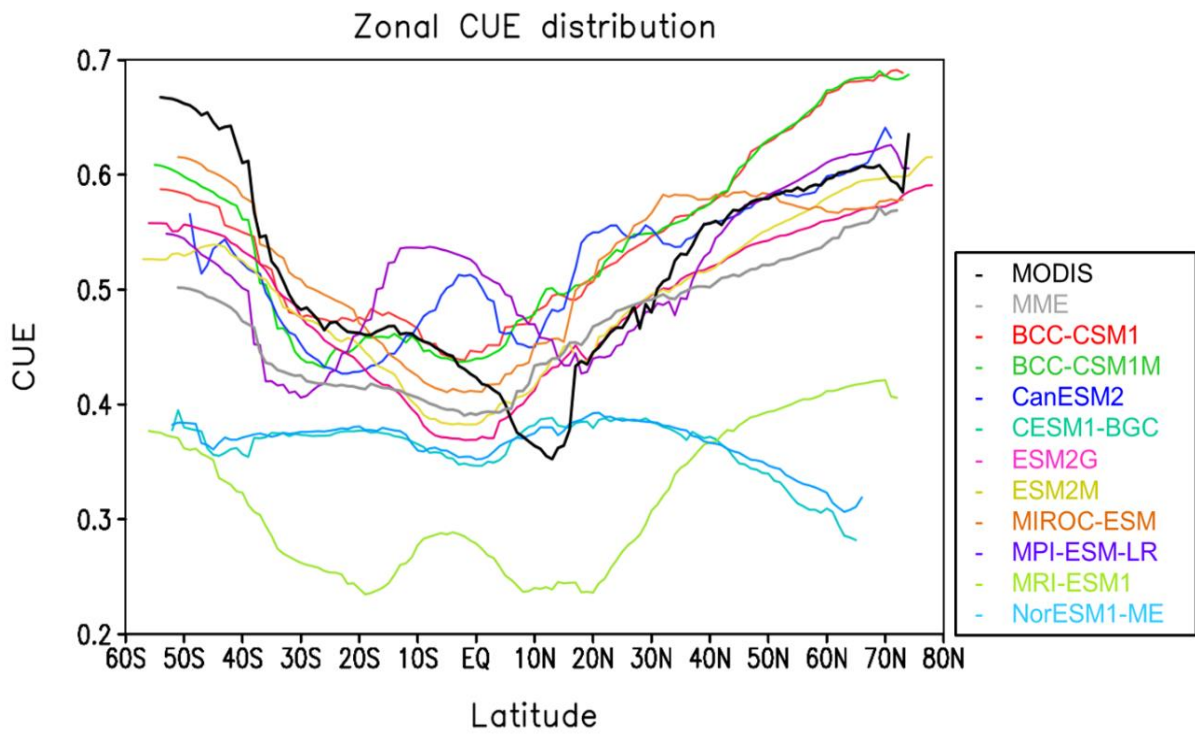

909

910 **Figure 10.** The zonal mean CUE from MODIS (black), MME (grey), and 10 ESMs (grey  
911 circles with number).

912

913

914

915

916

917

918

919

920

921

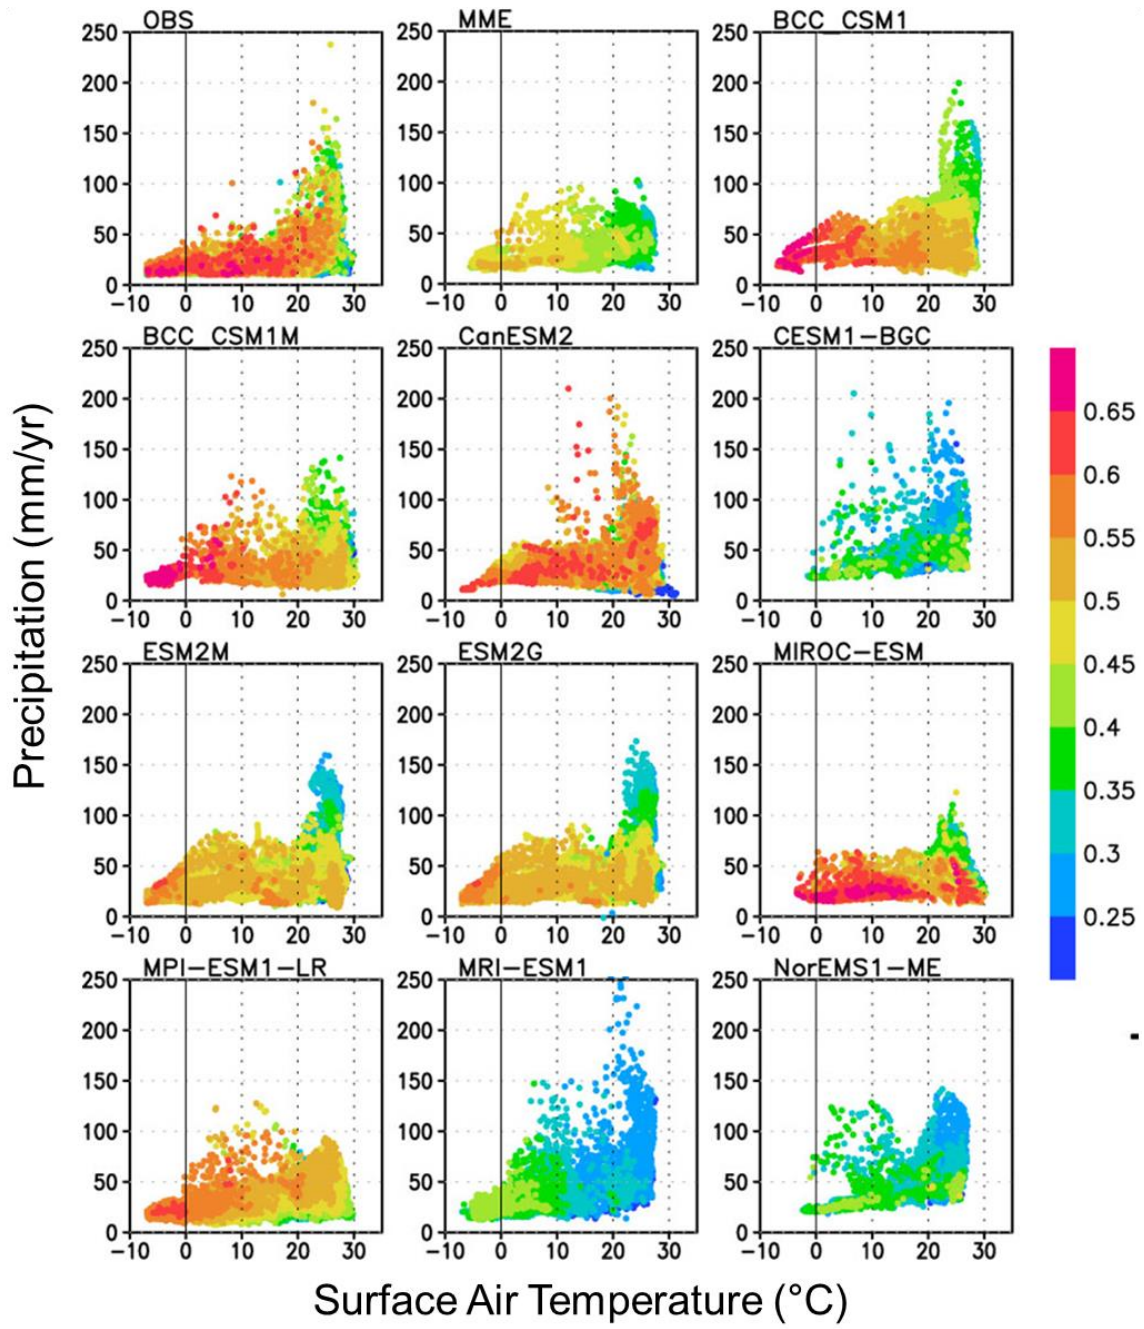

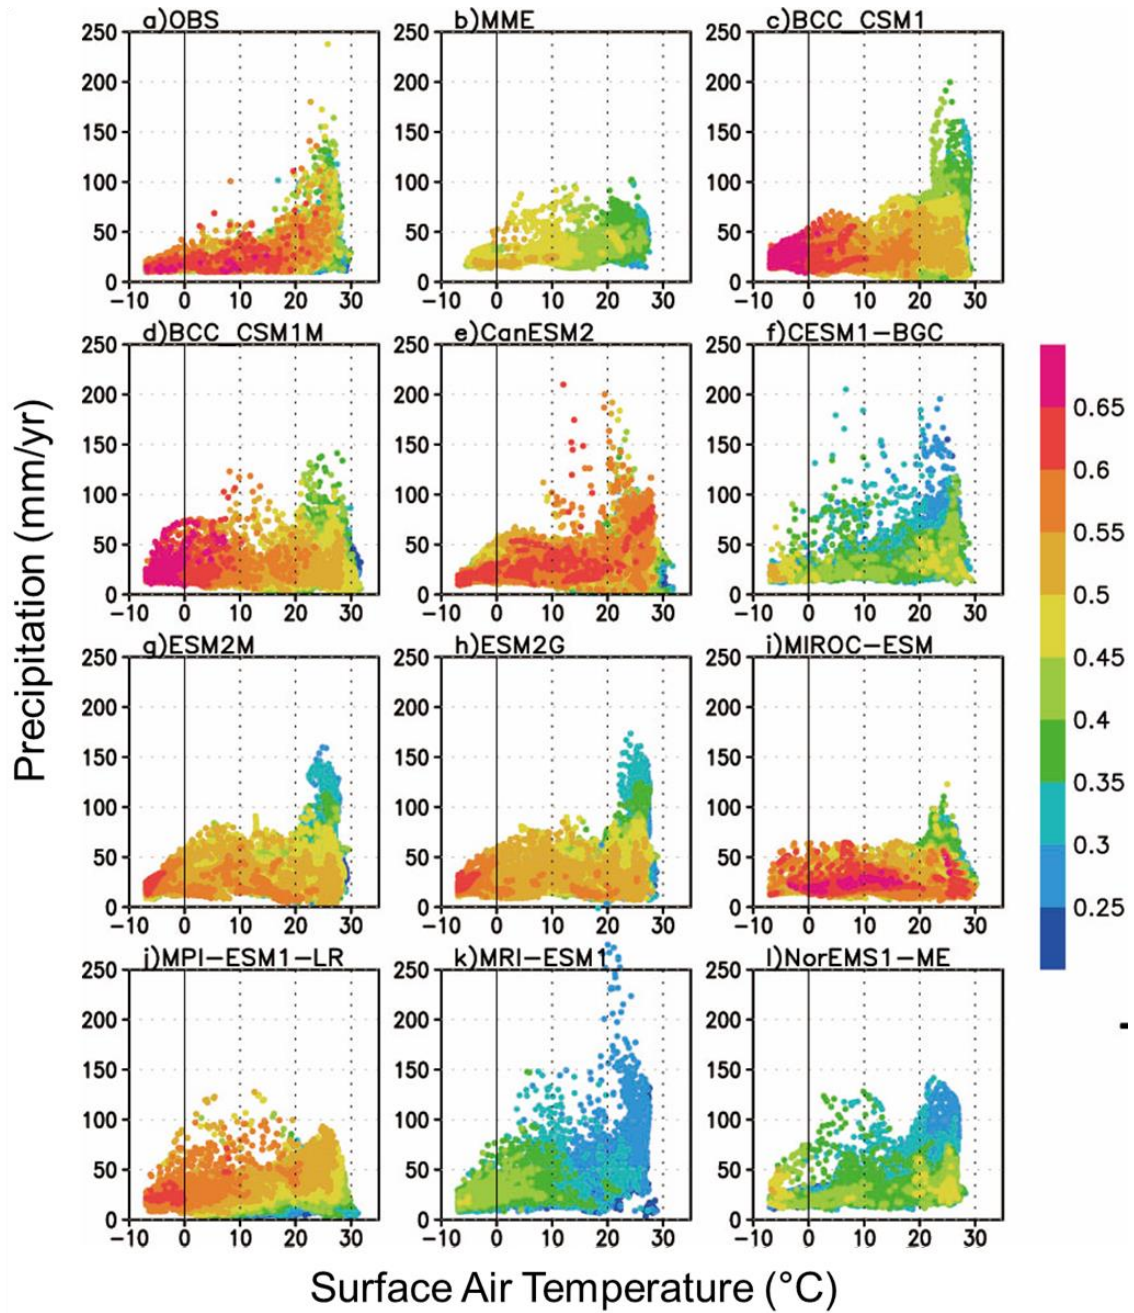

924

925 **Figure 11.** Scatter plot of CUE with the variation of surface air temperature (x-axis) and  
 926 precipitation (y-axis). Color indicates CUE.

927

928

929

930

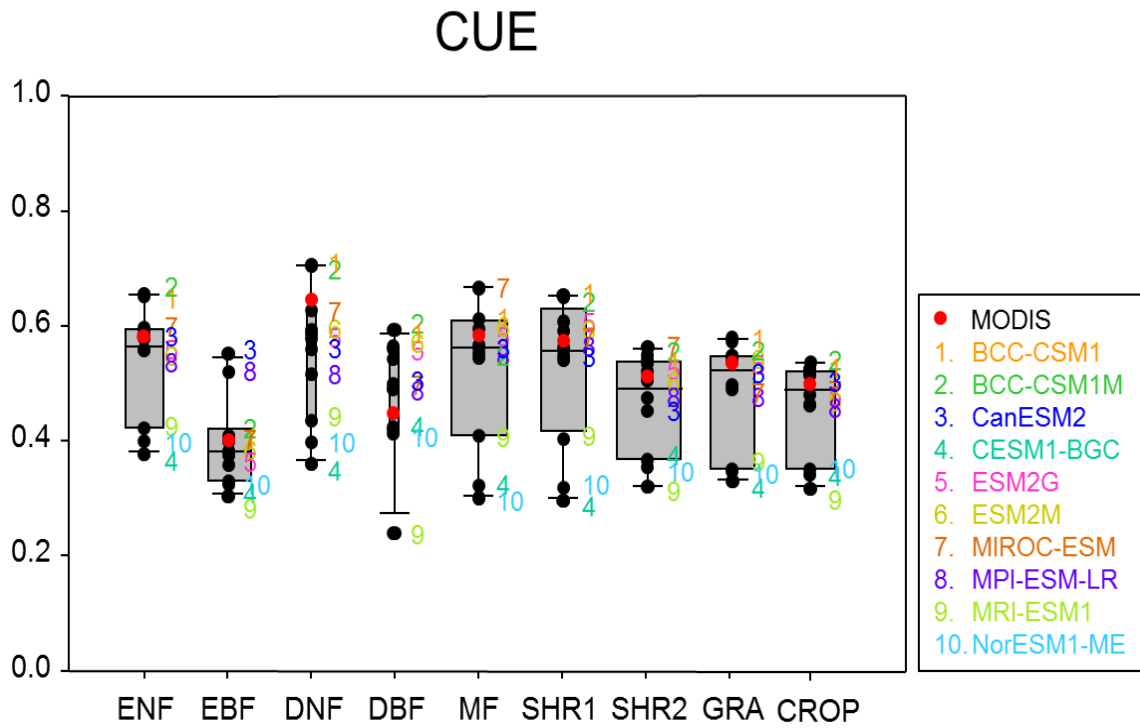

932

933 **Figure 12.** CUE averaged for each PFT. The box widths are proportional to the root mean  
 934 square of number of grids. The coefficients of proportionality box widths in each PFTs are:  
 935 ENF (0.80), EBF (0.48), DNF (0.12), DBF (0.11), MF (1.25), SHR1 (0.91), SHR2 (1.78), GRA  
 936 (0.70) and CROP (0.73).

937

938

939

940

941

942

943

944

945

946

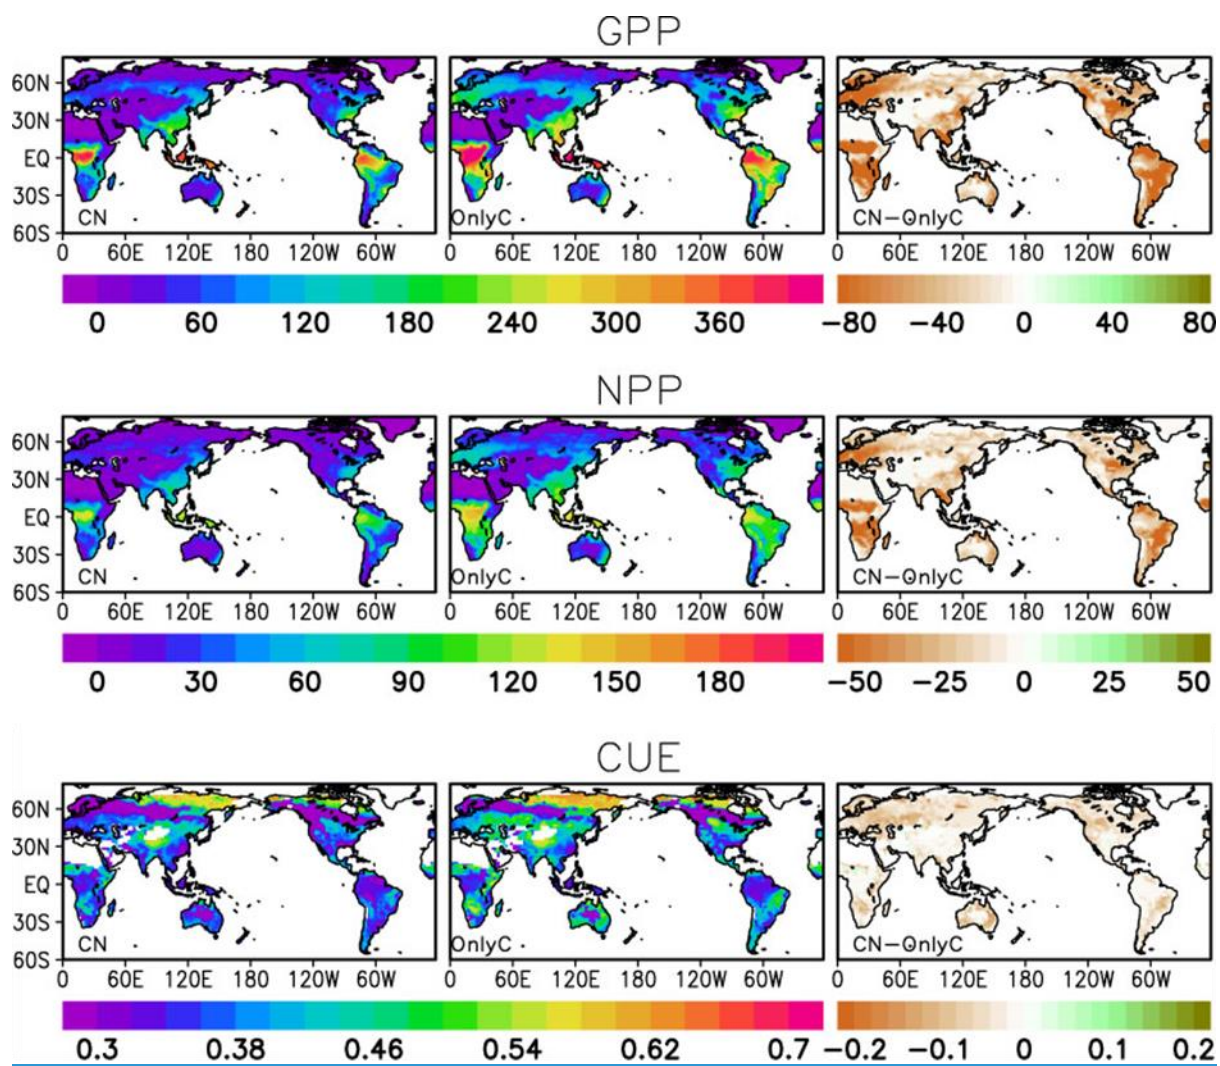

947



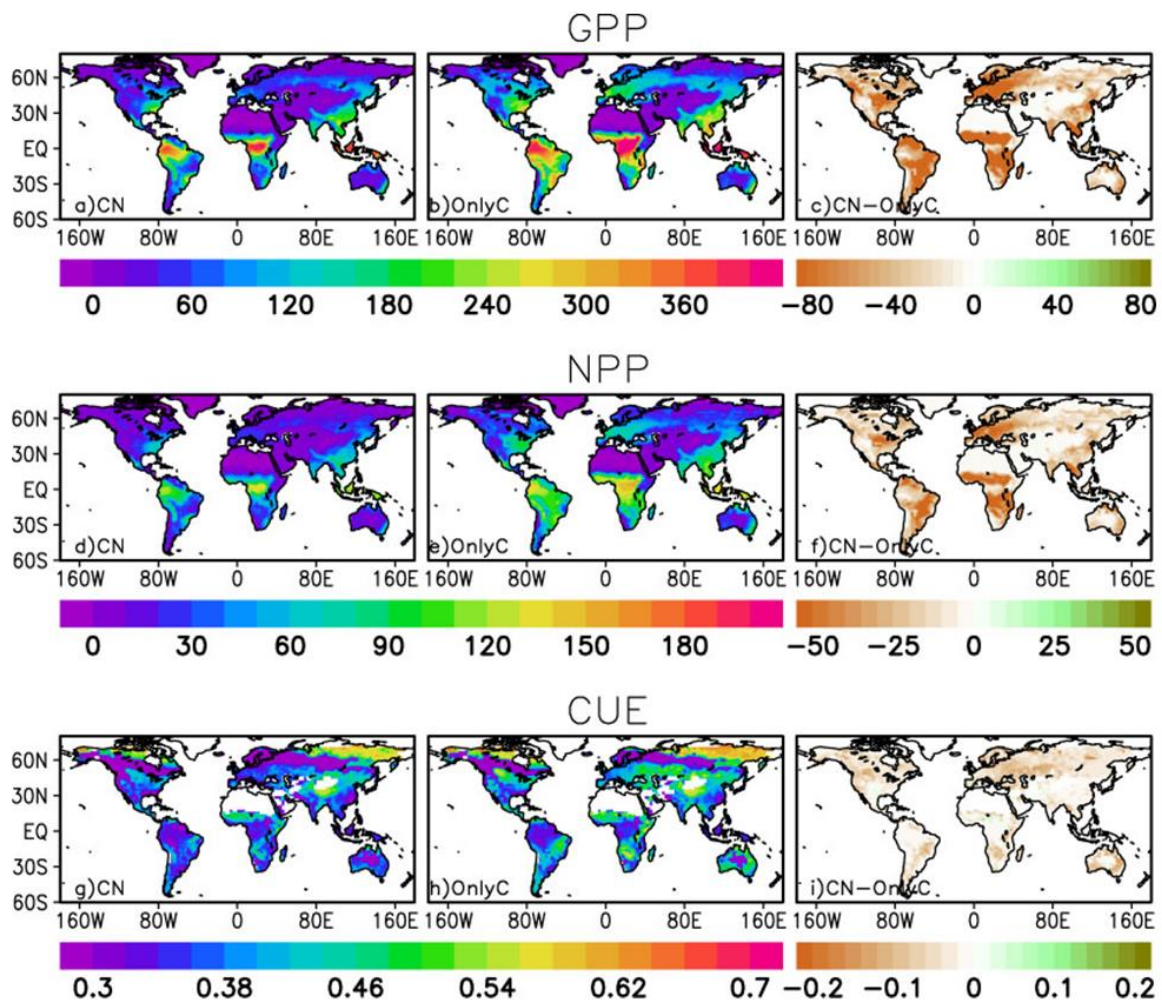

948

949 **Figure 13.** Spatial distributions of annual GPP, NPP and CUE and their differences from the  
 950 interactive carbon-nitrogen cycle simulation (CN) and the run with no nitrogen cycle (Only C)  
 951 by CESM-BGC. The units of GPP and NPP are  $\text{gC m}^2 \text{mon}^{-1}$ . CUE is a positively-defined ratio  
 952 as NPP divided by GPP and less than or equal to 1.

953

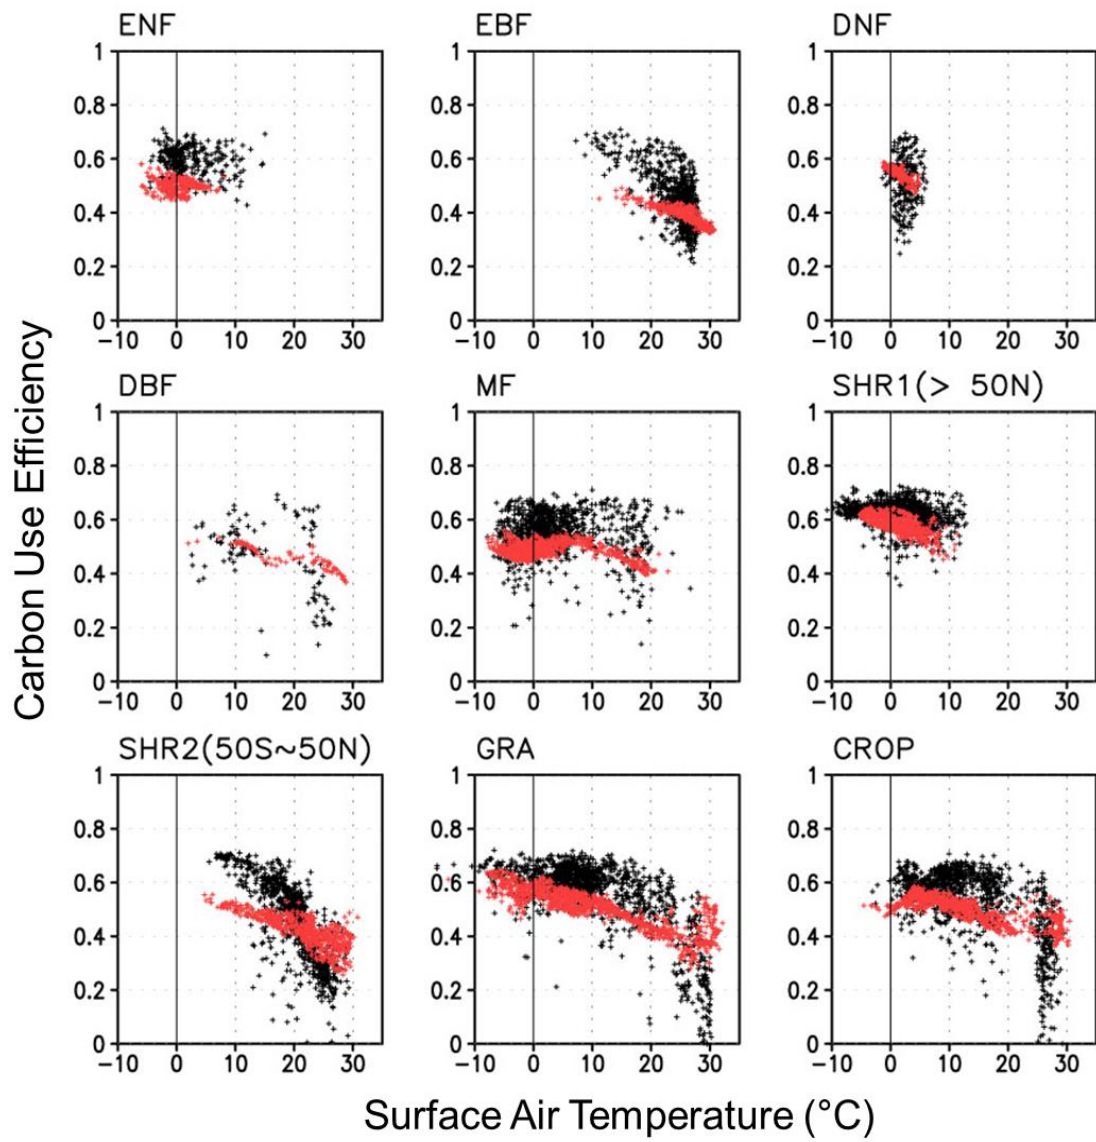

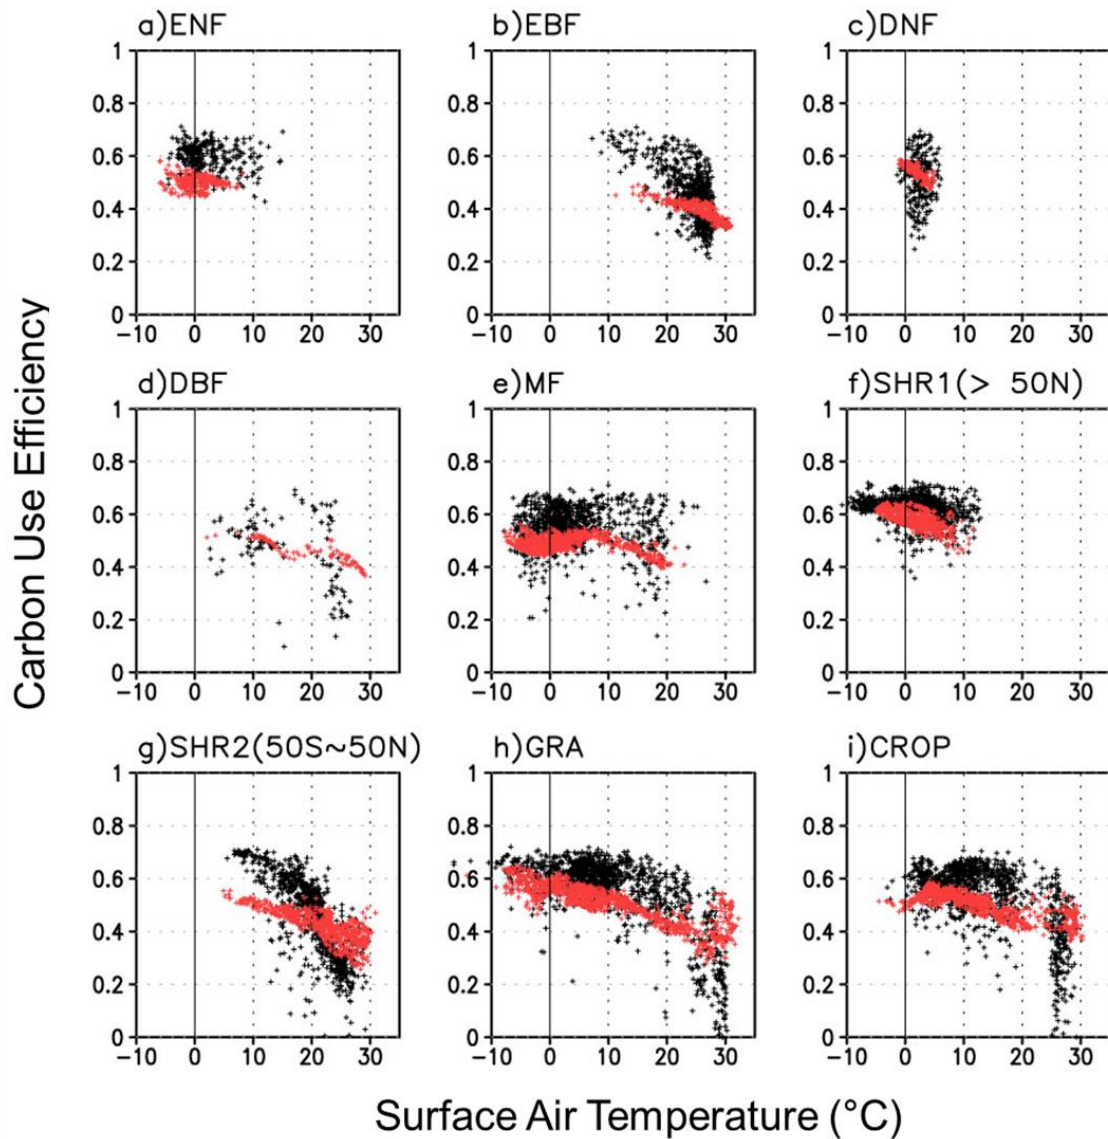

955

956 **Figure 14.** Scatter plots of CUE (y-axis) as a function of temperature (x-axis). Each panel  
 957 shows the plot for different PFT. Satellite-derived values from MODIS are presented with black  
 958 dots and the multi-model ensemble (MME) means by 10 ESMs are with red dots.

959

960

961

962



964  
965

**Table S1.** Comparison of averaged CUE for each PFTs.

|      | Kim et al. (2017) | Delucia et al. (2007) | Amthor (2000) | Choudhury (2000) | Zhang et al. (2008) | Average (STD) |
|------|-------------------|-----------------------|---------------|------------------|---------------------|---------------|
| ENF  | 0.59              | 0.41                  | 0.61          | -                | 0.56                | 0.54 (0.09)   |
| EBF  | 0.41              | 0.32                  | 0.54          | 0.42             | 0.32                | 0.40 (0.09)   |
| DNF  | 0.63              | 0.59                  | 0.76          | -                | 0.59                | 0.64 (0.08)   |
| DBF  | 0.42              | 0.46                  | 0.67          | -                | 0.51                | 0.52 (0.11)   |
| MF   | 0.60              | 0.45                  | -             | -                | 0.41                | 0.49 (0.10)   |
| SHR  | 0.54              | -                     | 0.50          | 0.45             | 0.52                | 0.50 (0.04)   |
| GRA  | 0.54              | -                     | 0.49          | 0.52             | 0.51                | 0.51 (0.02)   |
| CROP | 0.52              | -                     | 0.45          | 0.56             | 0.52                | 0.51 (0.05)   |

966  
967  
968  
969  
970  
971  
972  
973

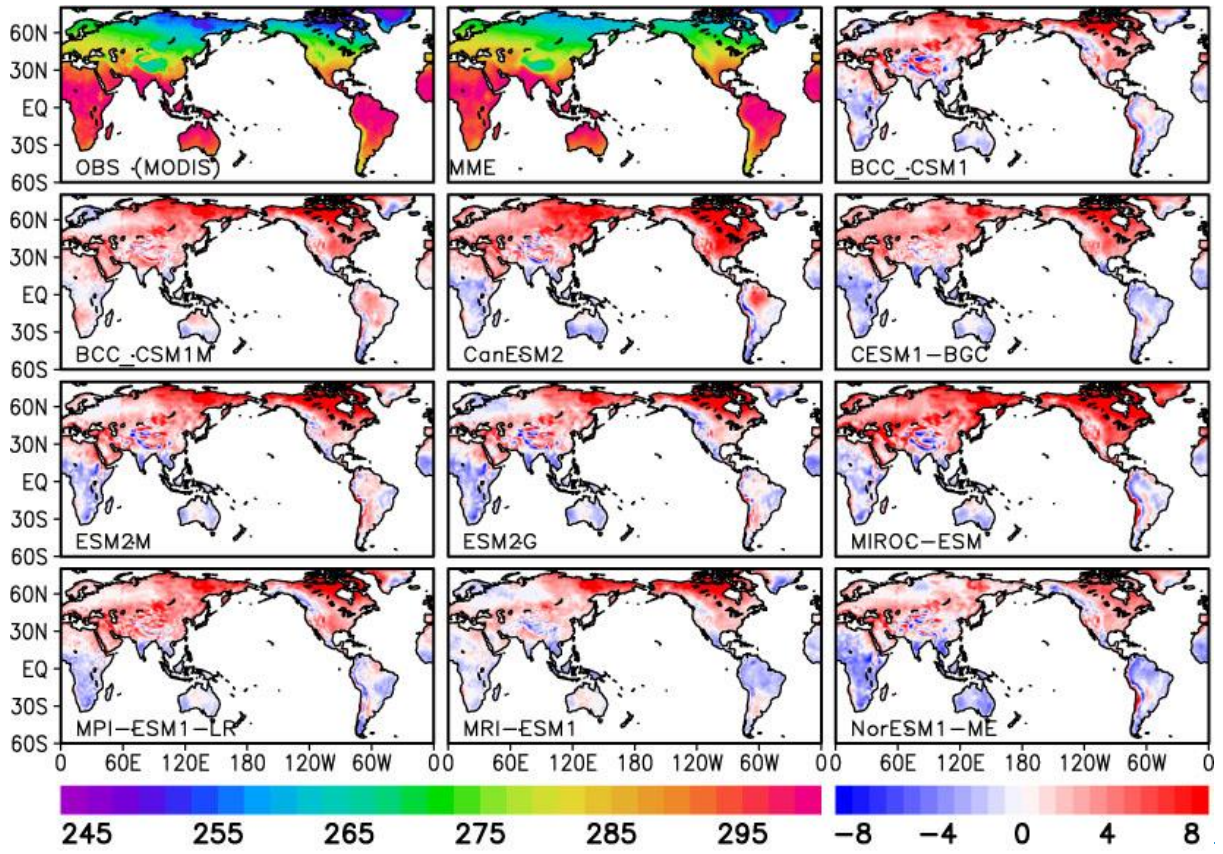

974

975

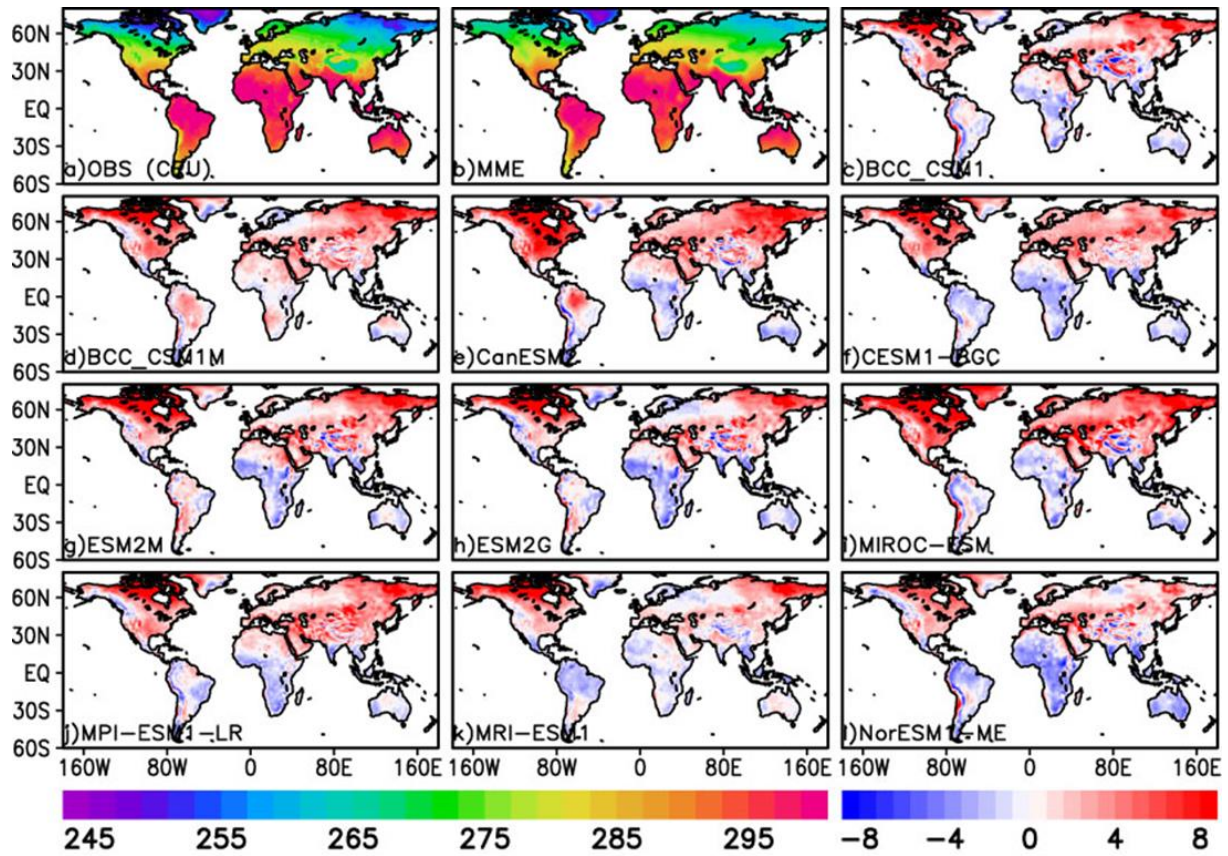

976

977

978

979

980

981

982

983

984

985

986

987

988

989

**Figure S1.** Spatial distribution of annual-mean surface air temperature from the CRU observation (top left), MME (top middle) and the simulation bias in each model (model minus CRU). The unit is K.

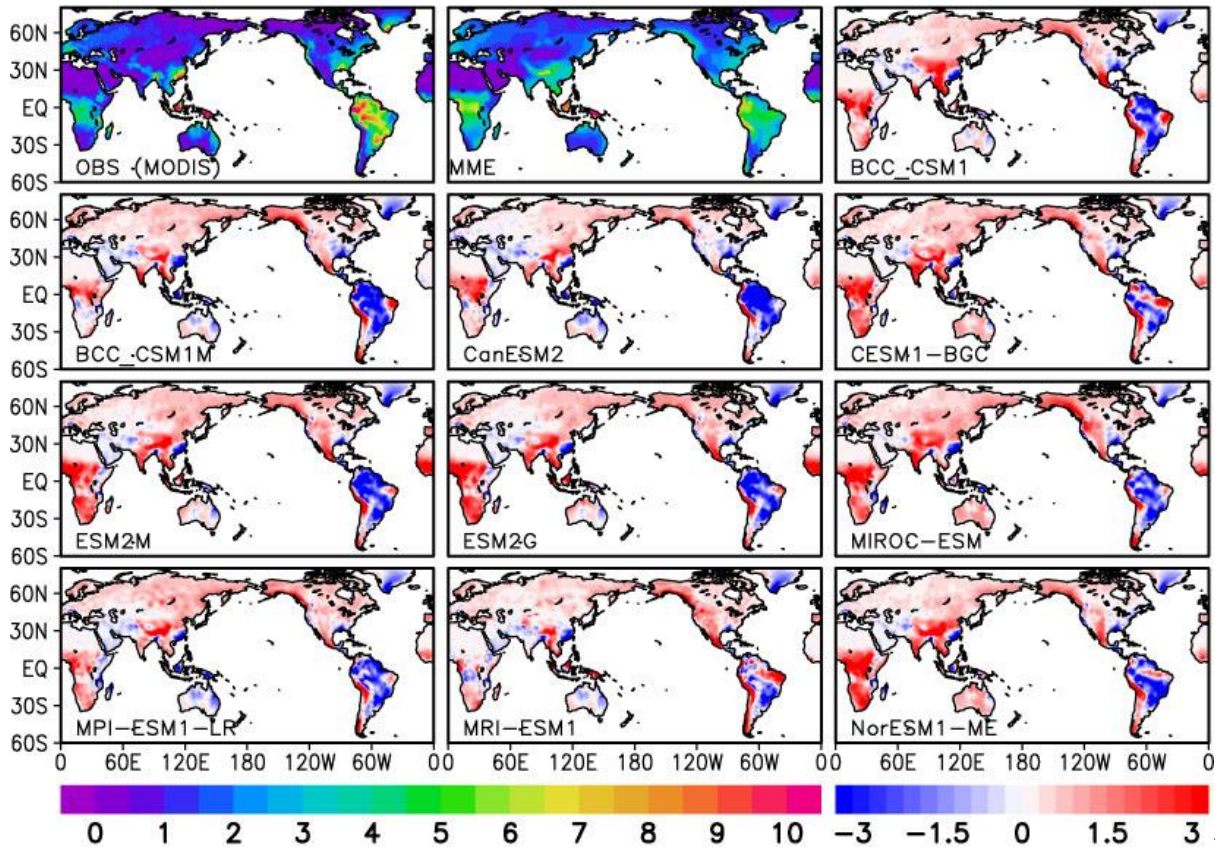

990

991



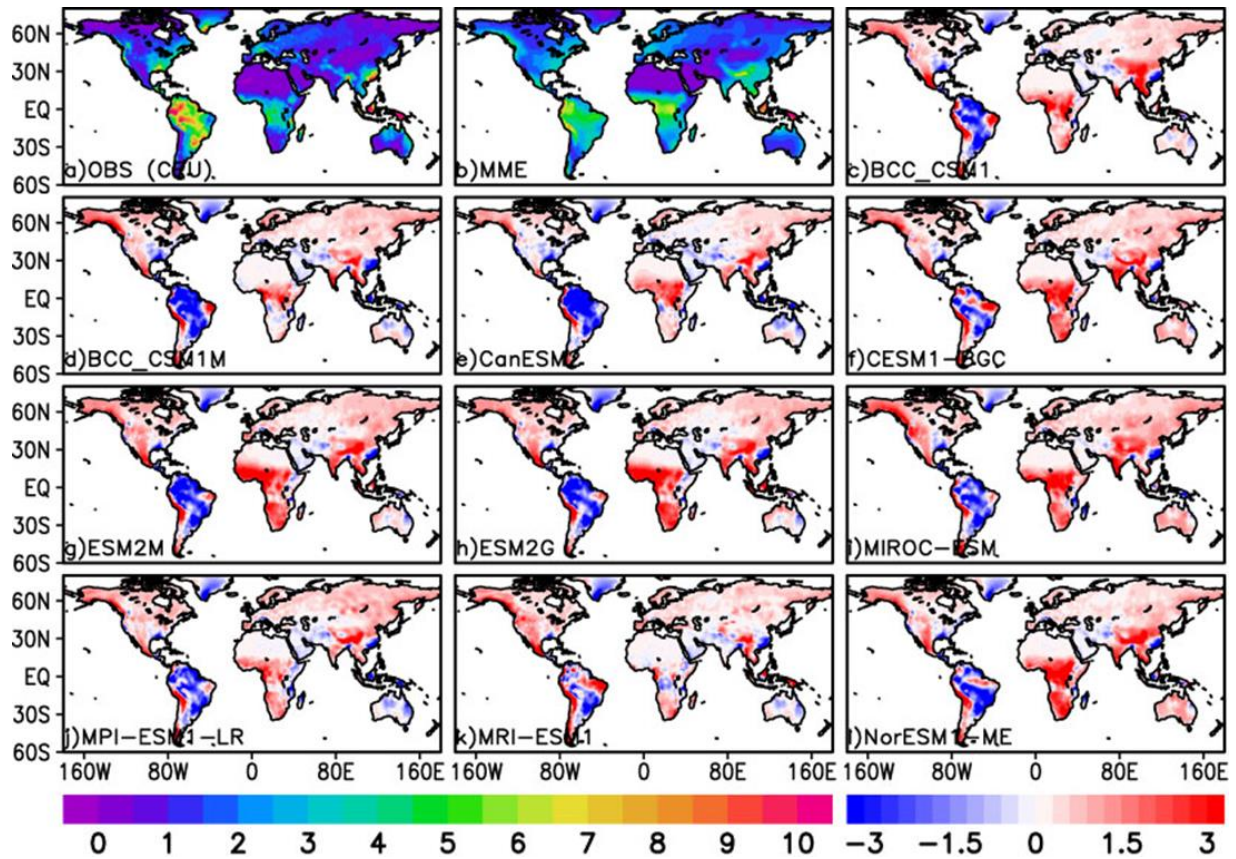

992

993

994

995

996

997

998

999

1000

1001

1002

1003

**Figure S2.** Spatial distribution of annual-mean precipitation from the CRU observation (top left), MME (top middle) and the simulation bias in each model (model minus CRU). The unit is  $\text{mm d}^{-1}$ .

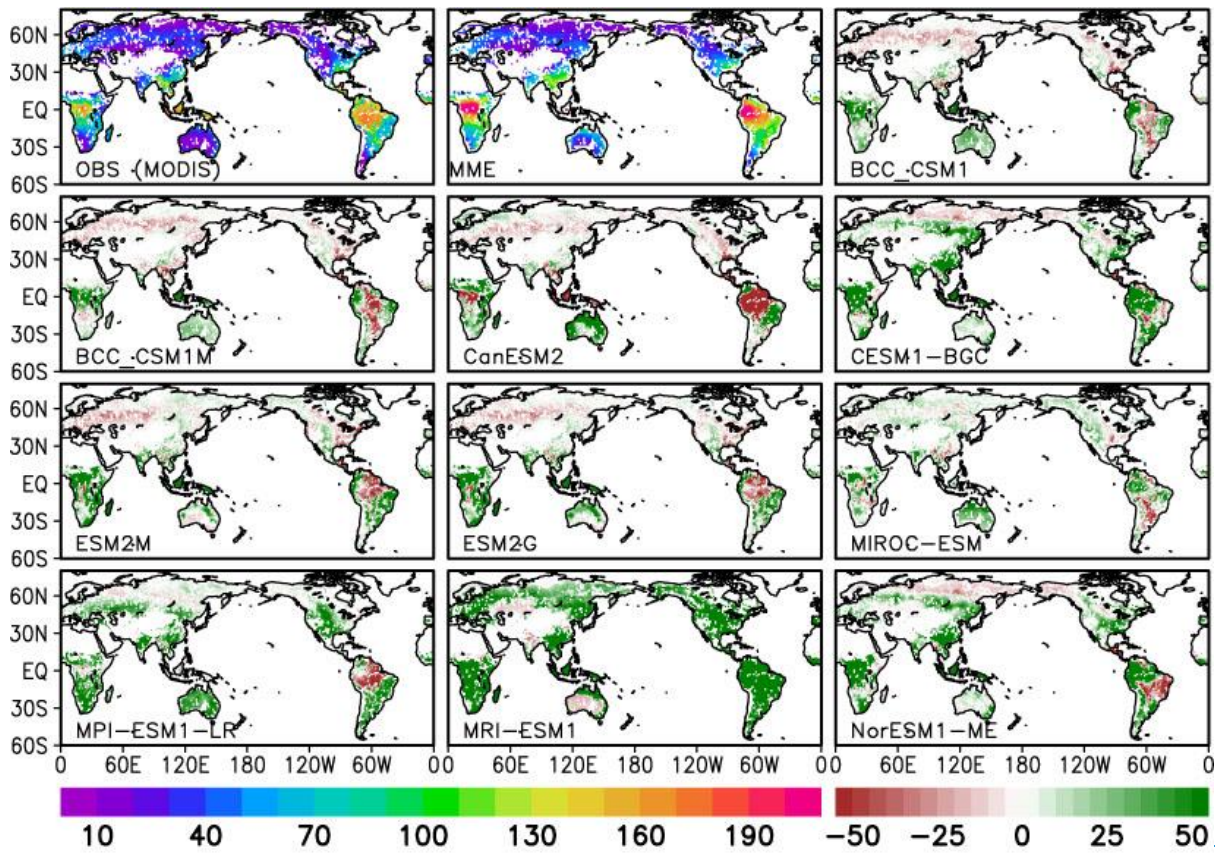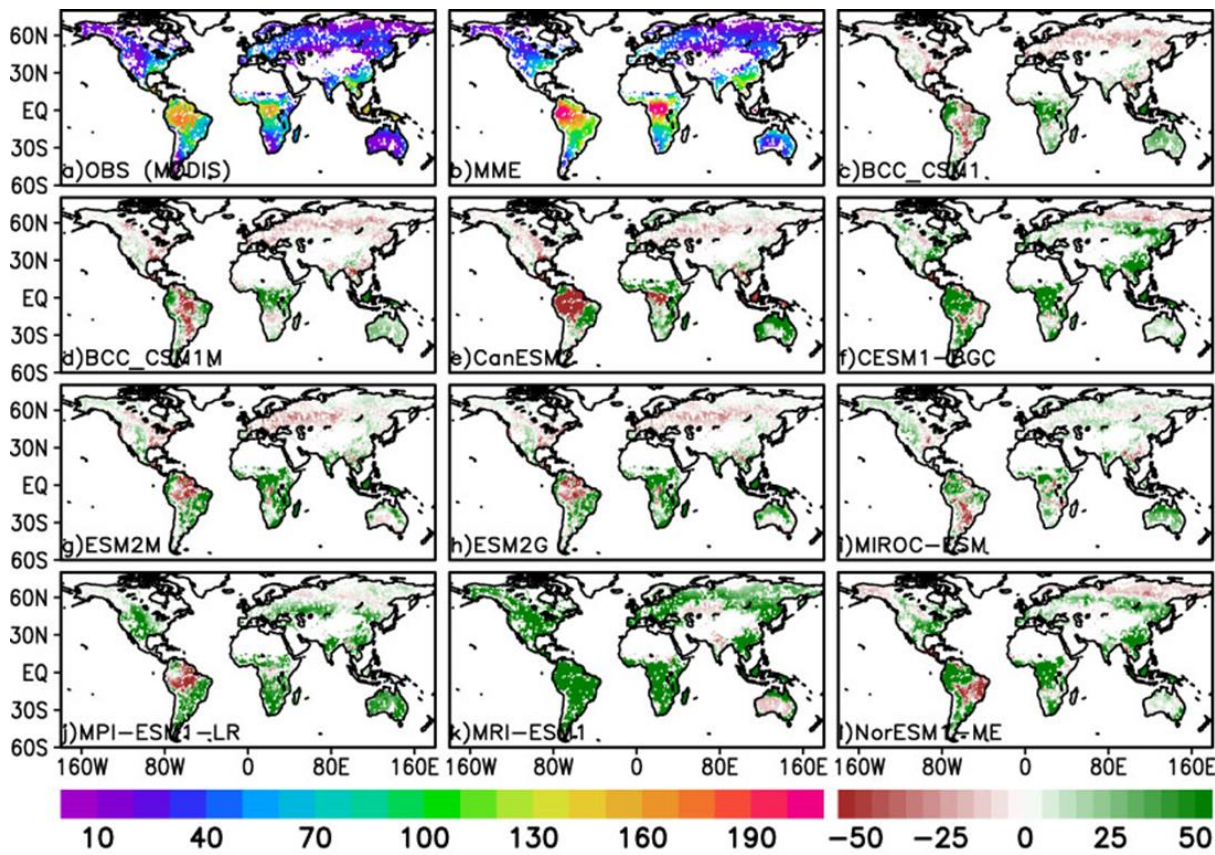

1006 **Figure S3.** Spatial distribution of annual Ra from the MODIS observation (top left), MME (top  
1007 middle) and the simulation bias in each model (model minus MODIS). The unit is  $\text{gC m}^2 \text{mon}^{-1}$   
1008 <sup>1</sup>.

1009

1010

1011

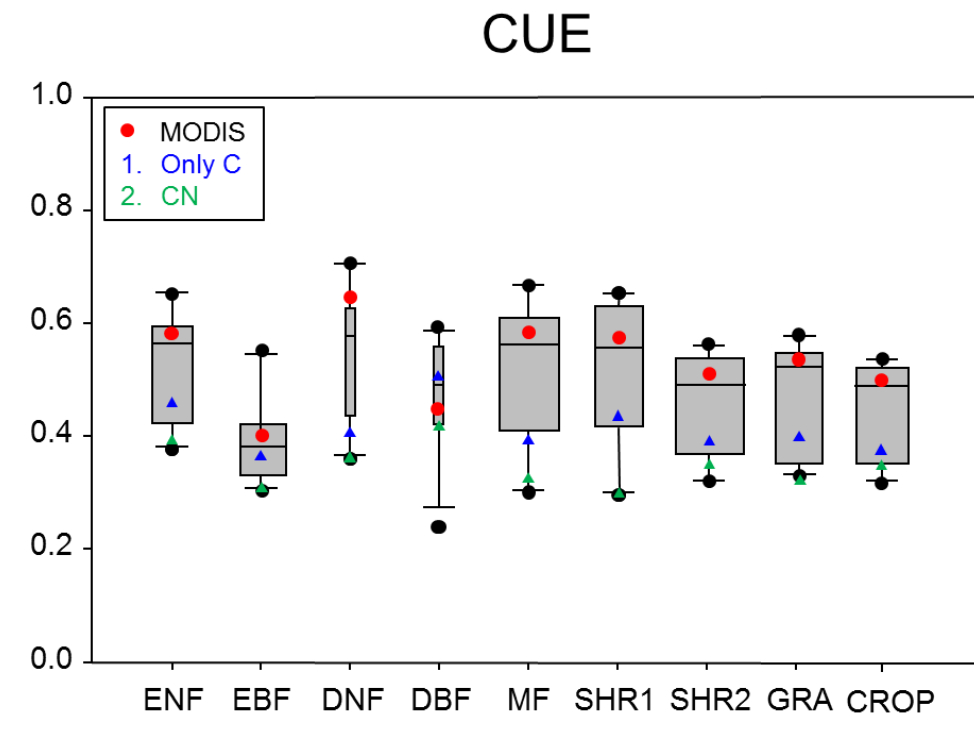

1012

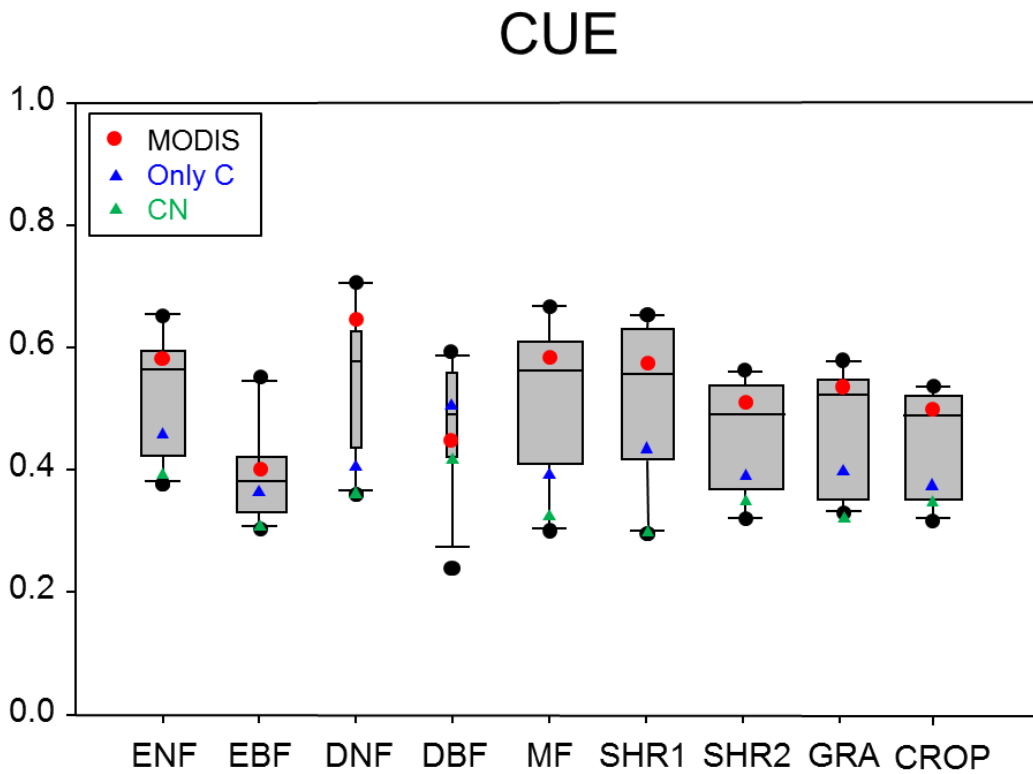

1013

**Figure S4.** Simulated CUE averaged for each PFT in the two model sensitivity experiments

1014

using NCAR CEMS-BGC. CN (green triangles) indicates the run with interactive CN cycle

1015

and Only C (blue triangles) indicates the run that the nitrogen limitation effect is disabled.

1016 MODIS is also shown in red dots. The box widths are proportional to the root mean square of  
1017 number of grids. The coefficients of proportionality box widths in each PFTs are: ENF (0.80),  
1018 EBF (0.48), DNF (0.12), DBF (0.11), MF (1.25), SHR1 (0.91), SHR2 (1.78), GRA (0.70) and  
1019 CROP (0.73).  
1020  
1021
